# Supplementary material
Source: PubMed Central journal article supplement (PMC3557919)
Supplement: cg301506x_si_001.pdf [file cg301506x_si_001.pdf]

# The complex polymorphic system of gallic acid - five monohydrates, three anhydrates and over 20 solvates

*Doris E. Braun, Rajni M. Bhardwaj, Alastair J. Florence, Derek A. Tocher and Sarah L. Price*

## Electronic Supporting Information

|          |                                                                                           |    |
|----------|-------------------------------------------------------------------------------------------|----|
| <b>1</b> | <b>COMPUTATIONAL</b> .....                                                                | 2  |
| 1.1      | Conformational analysis of gallic acid .....                                              | 2  |
| 1.2      | Computational generation of the anhydrate and monohydrate crystal energy landscapes ..... | 5  |
| 1.3      | Periodic ab initio calculations (DFT-D): relative energy differences .....                | 6  |
| 1.4      | Modelling of the experimental forms .....                                                 | 7  |
| 1.5      | The crystal energy landscapes .....                                                       | 12 |
| <b>2</b> | <b>EXPERIMENTAL</b> .....                                                                 | 17 |
| 2.1      | Materials .....                                                                           | 17 |
| 2.2      | Solid form screen .....                                                                   | 18 |
| 2.3      | Identification of gallic acid solid forms .....                                           | 25 |
| 2.4      | X-ray Crystallography (details for structure solutions) .....                             | 30 |
| 2.5      | Thermal Analysis, thermodynamic and kinetic stability .....                               | 36 |
| 2.6      | Moisture Sorption/Desorption Analysis .....                                               | 39 |

## 1 COMPUTATIONAL

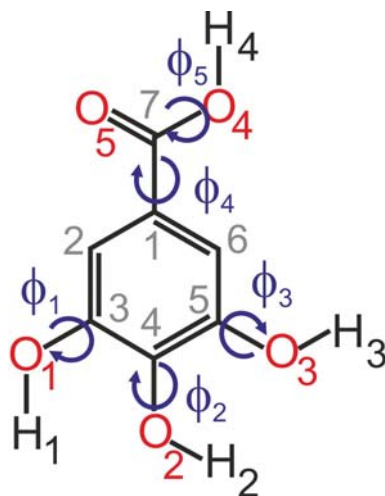

**Figure S1.** Molecular diagram of gallic acid. The torsions and angles that were optimized within the crystal energy minimization<sup>1</sup> were:  $\phi_1$  (H1-O1-C3-C2),  $\phi_2$  (H2-O2-C4-C3),  $\phi_3$  (H3-O3-C5-C4),  $\phi_4$  (C2-C1-C7-O5),  $\phi_5$  (H4-O4-C7-C1), H1-O1-C3, H2-O2-C4, H3-O3-C5, and H4-O4-C7.

### 1.1 Conformational analysis of gallic acid

Potential energy surface scans (Figure S2) revealed that the acid exhibits four planar conformational minima (Table S1), separated by significant barriers, arising from the rotation of the hydroxyl (C-C-O-H) and the carboxylic acid group (C-C-C-O), if the rotation of the carboxylic acid proton (C1-C7-O4-H4) is ignored. The OH-group can rotate significantly for minimal energy cost, in agreement with the experimental conformations. There is a significant energy difference for swapping the position of the COOH proton. The relative energies of the four fully optimized conformations depend on the level of theory, but there is a clear pattern of having pairs of conformations that are close in energy varying in the position of the COOH proton, i.e. the pair of conformations forming two intramolecular hydrogen bonds and the pair of conformations forming one intramolecular hydrogen bond (Table S1). The PCM ( $\epsilon=3$ , see section 1.2) model narrows the energy gap between the structures forming two intramolecular hydrogen bonds and structures forming one intramolecular hydrogen bond.

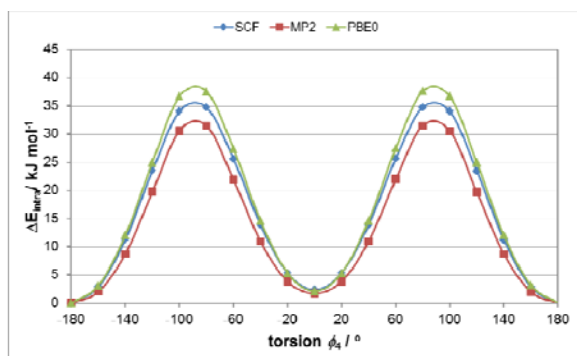

(a)  $\phi_4$  (C2-C1-C7-O5): conf2-conf1-conf2

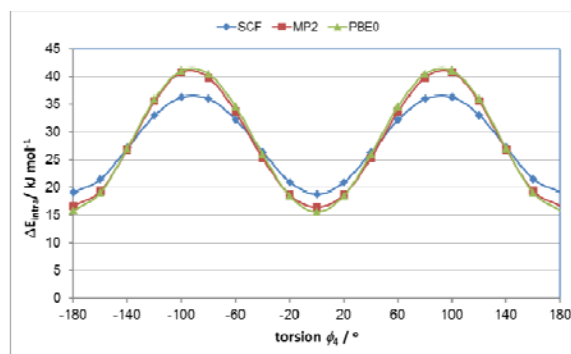

(b)  $\phi_4$  (C2-C1-C7-O5): conf3-conf4-conf3

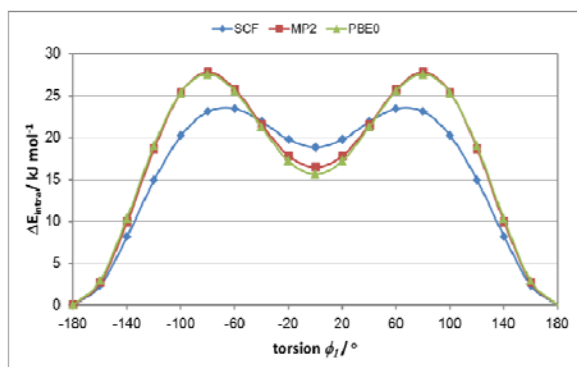

(c)  $\phi_1$  (H1-O1-C3-C2): conf2-conf4-conf2

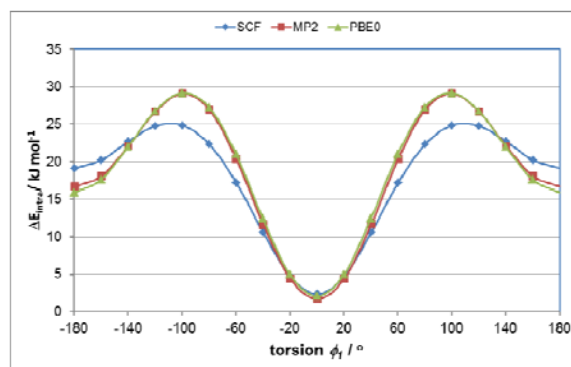

(d)  $\phi_3$  (H3-O3-C5-C4): conf3-conf1-conf3

**Figure S2.** Potential energy surface scans for gallic acid with respect to (a)  $\phi_4$  (C2-C1-C7-O5) starting with conf2 ( $-180^\circ$  and  $180^\circ$ ), (b)  $\phi_4$  (C2-C1-C7-O5) starting with conf3 ( $-180^\circ$  and  $180^\circ$ ), (c)  $\phi_1$  (H1-O1-C3-C2) starting with conf2 ( $-180^\circ$  and  $180^\circ$ ), and (d)  $\phi_3$  (H3-O3-C5-C4) starting with conf3 ( $-180^\circ$  and  $180^\circ$ ) at the SCF, MP2 and PBE0 level of theory with the 6-31G(d,p) basis set. The rest of the molecule was optimized at each value of  $\phi$ , which was calculated every  $10^\circ$ . For conformational diagrams of the minima see Table S1.

**Table S1.** Conformational energy minima for gallic acid and their energy ( $\Delta E_{\text{intra}}$ ) values with respect to the global conformational minimum (conf2), for different wave functions.

|                                                    | 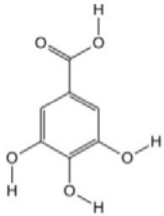 |  |  |  |
|----------------------------------------------------|-----------------------------------------------------------------------------------|-----------------------------------------------------------------------------------|------------------------------------------------------------------------------------|-------------------------------------------------------------------------------------|
| $+\Delta E_{\text{intra}}$ [kJ mol <sup>-1</sup> ] | conf1                                                                             | conf2                                                                             | conf3                                                                              | conf4                                                                               |
| SCF/6-31G(d,p)                                     | 2.36                                                                              | 0                                                                                 | 19.15                                                                              | 18.82                                                                               |
| MP2/6-31G(d,p)                                     | 1.69                                                                              | 0                                                                                 | 16.68                                                                              | 16.49                                                                               |
| PBE0/6-31G(d,p)                                    | 2.07                                                                              | 0                                                                                 | 15.89                                                                              | 15.63                                                                               |
| MP2/6-31G(d,p), PCM $\epsilon=3$                   | 1.51                                                                              | 0                                                                                 | 8.73                                                                               | 8.56                                                                                |
| PBE0/aug-cc-pVTz,<br>PCM $\epsilon=3$              | 1.47                                                                              | 0                                                                                 | 7.17                                                                               | 6.97                                                                                |
| Conformation present in<br>experimental forms:     | AH-II°,<br>AH-III,<br>MH-III                                                      | AH-I,<br>MH-I°                                                                    | MH-III,<br>MH-IV                                                                   | MH-II,<br>MH-V                                                                      |

## 1.2 Computational generation of the anhydrate and monohydrate crystal energy landscapes

Hypothetical crystal structures of gallic acid anhydrates ( $Z'=1$  and  $Z'=2$ ) and monohydrates ( $Z'=1$ ), for each of the four planar conformations, were generated with the program CrystalPredictor, which uses a low-discrepancy sequence to search the crystal packing space with quasi-random values for unit cell dimensions, molecular orientations and positions, followed by rigid molecule lattice energy minimization.<sup>2</sup> This resulted in four searches for  $Z'=1$  and ten for  $Z'=2$  anhydrates and four searches for the  $Z'=1$  monohydrates. For each of the hydrate searches crystal structures were generated in 24 common space groups ( $P1$ ,  $P-1$ ,  $P2_1$ ,  $P2_1/c$ ,  $P2_12_12$ ,  $P2_12_12_1$ ,  $Pna2_1$ ,  $Pca2_1$ ,  $Pbca$ ,  $Pbcn$ ,  $C2/c$ ,  $Cc$ ,  $C2$ ,  $P2_1/m$ ,  $P2/c$ ,  $C222_1$ ,  $Pnma$ ,  $Fdd2$ ,  $Fddd$ ,  $P4_1$ ,  $P4_12_12$ ,  $P4_32_12$ ,  $P3_1$ ,  $R-3$ ). The anhydrate searches covered 32 common space groups (with the addition of  $Pc$ ,  $Cm$ ,  $C2/m$ ,  $Pmn2_1$ ,  $Pmmn$ ,  $Pbcm$ ,  $Pccn$ ,  $Pnna$ ). In all searches the molecules were in a general position and held rigid. Searches were continued until 230,000 structures had been energy minimized for each search for the hydrates and  $Z'=2$  anhydrates and 50,000 for the  $Z'=1$  anhydrates. The model for the intermolecular forces was an isotropic atom-atom potential (FIT) using atomic charges fitted to the PBE0/6-31G(d,p) electrostatic potential using the CHELPG scheme.<sup>3</sup>

Following each CrystalPredictor search, the 10,000 lowest energy structures, or all those within 20 kJ mol<sup>-1</sup> range with respect to that search minimum, were used as starting points for lattice energy minimizations (DMACRYS<sup>4</sup>) using distributed multipoles<sup>5</sup> derived from the PBE0/aug-cc-pVTZ charge densities and the FIT parameters for the repulsion-dispersion energy. Conformations were kept rigid.

The most stable structures were refined allowing the conformational flexibility to optimize the proton positions and COOH torsion ( $\phi_4$ ), using CrystalOptimizer.<sup>1</sup> About 400 (126  $Z'=1$  and 280  $Z'=2$ ) anhydrate and 300 monohydrate structures had the acid and water conformation within the crystal structures refined, varying the 5 non-aromatic torsion angles, the 4 C-O-H and the water bond angles (Figure S1). All molecular structures and energies were calculated at the PBE0/6-31G(d,p) level of theory, with the intermolecular lattice energies evaluated from the PBE0/aug-cc-pVTZ wave function distributed multipoles and the FIT potential parameters for the repulsion-dispersion models. The choice of structures to be refined by CrystalOptimizer took into account the known problem that the intramolecular energy penalty was likely to be overestimated for conf3 and conf4 (see Table S1).

To approximate the polarization of the molecule charge distribution in the crystal, as has been found necessary in CSP studies of peptides<sup>6,7</sup> and dihydroxybenzoic acids,<sup>8</sup> the charge density used in the evaluation of  $E_{latt}$  was generated in a dielectric continuum, with a dielectric constant  $\epsilon=3$ , a value typical of organic crystals. Thus, the final PBE0/aug-cc-pVTz electron density calculations used the polarizable continuum model (PCM)<sup>9</sup> implemented in Gaussian03. The intramolecular energy penalty  $\Delta E_{intra}$  was calculated from the electron density calculations derived in the CrystalOptimizer step.

The relationships between crystal structures were examined using the *XPac* program<sup>10</sup> and differences quantified using the overlay<sup>11</sup> of a 15 molecule cluster, rmsd<sub>15</sub>, as calculated using the Molecular Similarity Module in Mercury.<sup>12</sup>

### 1.3 Periodic ab initio calculations (DFT-D): relative energy differences

Periodic electronic structure calculations have the advantage of not requiring separation into inter- and intramolecular interactions and that polarization is being automatically modelled well.

Therefore periodic electronic structure calculations were carried out on all experimental and closely related structures (which differ in proton positions, Table S2) with the CASTEP plane wave code<sup>13</sup> using the Perdew-Burke-Ernzerhof (PBE) generalized gradient approximation (GGA) exchange-correlation density functional<sup>14</sup> and ultrasoft pseudopotentials,<sup>15</sup> with the addition of a semi-empirical dispersion correction (Tkatchenko and Scheffler<sup>16</sup>). The results reported were obtained using a plane wave cut of energy of 780 eV and a Monkhorst-Pack<sup>17</sup> Brillouin zone sampling grid of spacing  $2\pi \times 0.07\text{\AA}^{-1}$ . The required force tolerance for a successful geometry optimization in each run was 0.05 eV  $\text{\AA}^{-1}$ . The enthalpy differences between the polymorphs changed by  $< 0.2 \text{ kJ mol}^{-1}$  on doubling the cut off energy to 1560 eV, while the enthalpy change on a sampling grid of spacing  $2\pi \times 0.03\text{\AA}^{-1}$  was smaller ( $< 0.1 \text{ kJ mol}^{-1}$ ).

**Table S2.** Periodic ab initio calculations (DFT-D) and polarizable continuum model (PCM ( $\epsilon=3$ ), see 1.2) calculations for selected anhydrate and monohydrate structures. The structures with the protons position either derived from single crystal X-ray diffraction experiments or used as input for the structure solutions from powder X-ray diffraction data are in bold.

| Structure ID   | (related to) "exptl." phase                            | Molecule $\Psi$ [PCM ( $\epsilon=3$ )]/<br>$\Delta E_{\text{latt}} / \text{kJ mol}^{-1}$ | Crystal $\Psi$ [DFT-D]/<br>$\Delta E_{\text{latt}} / \text{kJ mol}^{-1}$ |
|----------------|--------------------------------------------------------|------------------------------------------------------------------------------------------|--------------------------------------------------------------------------|
| <b>A1_1</b>    | <b>AH-II° (<math>C2/c</math>, <math>Z'=1</math>)</b>   | <b>0</b>                                                                                 | <b>0</b>                                                                 |
| A13_2          | AH-II° ( $P2_1/c$ , $Z'=2$ )                           | +1.10                                                                                    | +0.76                                                                    |
| A14_119        | AH-II° ( $Cc$ , $Z'=2$ )                               | +1.60                                                                                    | +8.86                                                                    |
| <b>A22_473</b> | <b>AH-I (<math>P-1</math>, <math>Z'=2</math>)</b>      | <b>-1.16</b>                                                                             | <b>+1.91</b>                                                             |
| A12_38         | AH-I ( $P-1$ , $Z'=2$ )                                | +0.55                                                                                    | +4.41                                                                    |
| A13_20         | AH-I ( $P-1$ , $Z'=2$ )                                | +0.06                                                                                    | +6.73                                                                    |
| A12_1180       | AH-I ( $P-1$ , $Z'=2$ )                                | -1.19                                                                                    | +7.08                                                                    |
| A11_4369       | AH-I ( $P-1$ , $Z'=2$ )                                | +1.16                                                                                    | +8.12                                                                    |
| <b>A1_20</b>   | <b>AH-III (<math>P2_1/c</math>, <math>Z'=1</math>)</b> | <b>+4.77</b>                                                                             | <b>+3.16</b>                                                             |
| A3_86          | AH-III ( $P2_1/c$ , $Z'=1$ )                           | +2.66                                                                                    | +4.96                                                                    |
| A4_20          | AH-III ( $P2_1/c$ , $Z'=1$ )                           | +12.49                                                                                   | +10.94                                                                   |
| <b>H2_312</b>  | <b>MH-I° (<math>P2/n</math>, <math>Z'=1</math>)</b>    | <b>+1.99</b>                                                                             | <b>+1.51</b>                                                             |
| <b>H4_1532</b> | <b>MH-II (<math>P2_1/c</math>, <math>Z'=1</math>)</b>  | <b>+3.49</b>                                                                             | <b>+5.07</b>                                                             |
| H2_104         | MH-II ( $P2_1/c$ , $Z'=1$ )                            | -4.06                                                                                    | +6.99                                                                    |
| <b>MH-III</b>  | <b>MH-III (<math>P-1</math>, <math>Z'=4</math>)</b>    | <b>+1.45</b>                                                                             | <b>+1.00</b>                                                             |
| <b>H3_933</b>  | <b>MH-IV (<math>P2_1/c</math>, <math>Z'=1</math>)</b>  | <b>0</b>                                                                                 | <b>0</b>                                                                 |
| <b>H4_1904</b> | <b>MH-V (<math>P2_1/c</math>, <math>Z'=1</math>)</b>   | <b>-2.80</b>                                                                             | <b>+11.62</b>                                                            |

## 1.4 Modelling of the experimental forms

The computational models were successful in reproducing the experimental anhydrate and hydrate structures of gallic acid (Table S3, Figures S3 to S10).

**Table S3.** Quality of representation of the experimental anhydrate and monohydrate structures.

|                              | Lattice parameters (cell vectors/Å, angles/°) |          |          |          |         |          | cell density (g cm <sup>-3</sup> ) | rmsd <sub>15</sub> <sup>a</sup> (Å) |
|------------------------------|-----------------------------------------------|----------|----------|----------|---------|----------|------------------------------------|-------------------------------------|
|                              | <i>a</i>                                      | <i>b</i> | <i>c</i> | $\alpha$ | $\beta$ | $\gamma$ |                                    |                                     |
| AH-I (exp.)                  | 7.318                                         | 8.253    | 11.715   | 100.47   | 90.23   | 90.99    | 1.624                              | -0.24                               |
| CryOpt (calc.)               | 7.501                                         | 8.117    | 11.534   | 98.41    | 91.25   | 92.56    | 1.628                              | 0.33                                |
| PCM ( $\epsilon=3$ ) (calc.) | 7.590                                         | 8.048    | 11.413   | 98.17    | 90.84   | 93.41    | 1.641                              | 0.20                                |
| DFT-D (calc.)                | 7.170                                         | 8.337    | 11.554   | 98.99    | 92.99   | 91.24    | 1.668                              |                                     |
| AH-II <sup>o</sup> (exp.)    | 25.685                                        | 4.927    | 11.251   | 90       | 106.23  | 90       | 1.653                              | -                                   |
| CryOpt (calc.)               | 25.052                                        | 5.061    | 10.949   | 90       | 103.48  | 90       | 1.674                              | 0.21                                |
| PCM ( $\epsilon=3$ ) (calc.) | 26.276                                        | 4.762    | 11.455   | 90       | 108.65  | 90       | 1.664                              | 0.20                                |
| DFT-D (calc.)                | 26.499                                        | 4.715    | 11.337   | 90       | 108.33  | 90       | 1.681                              | 0.22                                |
| AH-III (exp.)                | 5.230                                         | 5.265    | 24.793   | 90       | 102.11  | 90       |                                    | -                                   |
| CryOpt (calc.)               | 5.427                                         | 5.158    | 24.326   | 90       | 101.74  | 90       | 1.695                              | 0.27                                |
| PCM ( $\epsilon=3$ ) (calc.) | 5.461                                         | 5.072    | 24.491   | 90       | 102.86  | 90       | 1.707                              | 0.30                                |
| DFT-D (calc.)                | 5.524                                         | 4.769    | 25.230   | 90       | 99.05   | 90       | 1.721                              | 0.50                                |
| MH-I (exp.) <sup>b</sup>     | 14.150                                        | 3.622    | 19.246   | 90       | 129.27  | 90       | 1.636                              | -                                   |
| CryOpt (calc.)               | 14.241                                        | 3.489    | 19.142   | 90       | 129.43  | 90       | 1.701                              | 0.19                                |
| PCM ( $\epsilon=3$ ) (calc.) | 14.125                                        | 3.488    | 18.923   | 90       | 129.08  | 90       | 1.727                              | 0.19                                |
| DFT-D (calc.)                | 14.068                                        | 3.587    | 18.920   | 90       | 129.60  | 90       | 1.699                              | 0.08                                |
| MH-II (exp.) <sup>c</sup>    | 9.794                                         | 3.612    | 21.591   | 90       | 91.27   | 90       | 1.636                              | -                                   |
| CryOpt (calc.)               | 9.636                                         | 3.536    | 21.560   | 90       | 92.23   | 90       | 1.702                              | 0.11                                |
| PCM ( $\epsilon=3$ ) (calc.) | 9.542                                         | 3.542    | 21.416   | 90       | 91.11   | 90       | 1.728                              | 0.11                                |
| DFT-D (calc.)                | 9.618                                         | 3.575    | 21.403   | 90       | 91.19   | 90       | 1.698                              | 0.09                                |
| MH-III (exp.) <sup>d</sup>   | 7.117                                         | 7.506    | 30.679   | 86.56    | 83.81   | 68.70    | 1.649                              | -                                   |
| CryOpt (calc.)               | 7.076                                         | 7.579    | 30.452   | 87.35    | 82.79   | 68.41    | 1.659                              | 0.14                                |
| PCM ( $\epsilon=3$ ) (calc.) | 7.043                                         | 7.543    | 30.487   | 87.20    | 83.26   | 68.86    | 1.687                              | 0.15                                |
| DFT-D (calc.)                | 7.161                                         | 7.411    | 30.627   | 79.57    | 89.64   | 66.93    | 1.688                              | 0.13                                |
| MH-IV (exp.) <sup>e</sup>    | 5.794                                         | 4.719    | 28.688   | 90       | 95.08   | 90       | 1.599                              | -                                   |
| CryOpt (calc.)               | 6.478                                         | 3.989    | 30.370   | 90       | 101.95  | 90       | 1.633                              | 0.84                                |
| PCM ( $\epsilon=3$ ) (calc.) | 6.378                                         | 3.972    | 30.312   | 90       | 102.12  | 90       | 1.664                              | 0.73                                |
| DFT-D (calc.)                | 6.209                                         | 4.034    | 30.501   | 90       | 101.05  | 90       | 1.667                              | 0.65                                |
| MH-V (exp.)                  | 7.607                                         | 3.641    | 26.792   | 90       | 98.42   | 90       | 1.702                              | -                                   |
| CryOpt (calc.)               | 7.631                                         | 3.814    | 25.092   | 90       | 98.79   | 90       | 1.732                              | 0.32                                |
| PCM ( $\epsilon=3$ ) (calc.) | 7.569                                         | 3.815    | 25.019   | 90       | 98.64   | 90       | 1.750                              | 0.33                                |
| DFT-D (calc.)                | 7.567                                         | 3.854    | 25.458   | 90       | 98.94   | 90       | 1.704                              | 0.32                                |

<sup>a</sup>Reproduction of the experimental crystal structures was evaluated by the optimal root-mean square overlay of all non-hydrogen atoms in a 15 molecule coordination cluster (rmsd<sub>15</sub>).<sup>11</sup> Experimental structures (CSD refcodes):

<sup>b</sup>KONTIQ01, <sup>c</sup>KONTIQ03, <sup>d</sup>KONTIQ04 and <sup>e</sup>KONTIQ.

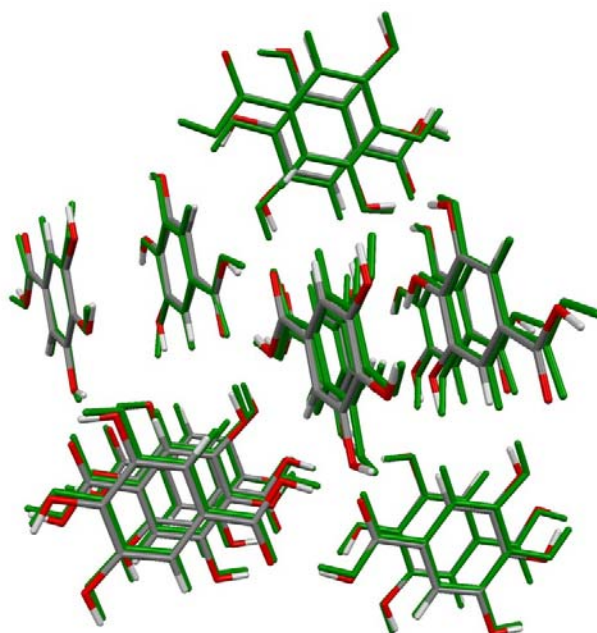

**Figure S3.** Overlay of the 15 molecule cluster of the observed structure of **AH-I** (colored by element and calculated DFT-D structure (green),  $\text{rmsd}_{15}=0.20 \text{ \AA}$ .

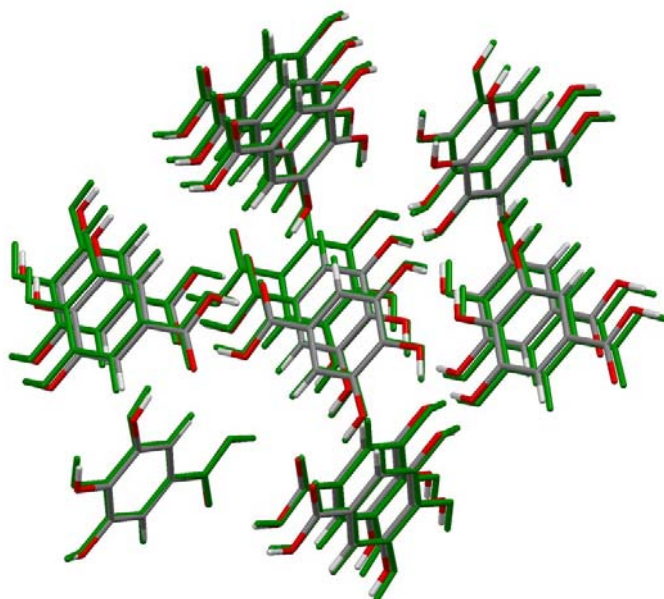

**Figure S4.** Overlay of the 15 molecule cluster of the observed structure of **AH-II**<sup>o</sup> (colored by element and calculated DFT-D structure (green),  $\text{rmsd}_{15}=0.22 \text{ \AA}$ .



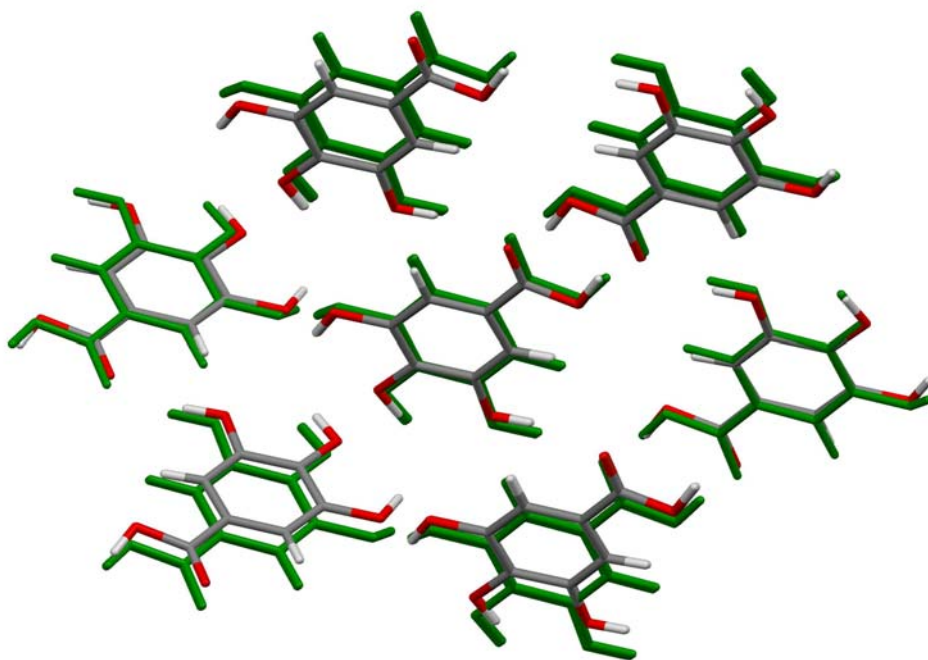

**Figure S5.** Overlay of the 15 molecule cluster of the observed structure of **AH-III** (colored by element and calculated DFT-D structure (green),  $\text{rmsd}_{15}=0.50 \text{ \AA}$ ).

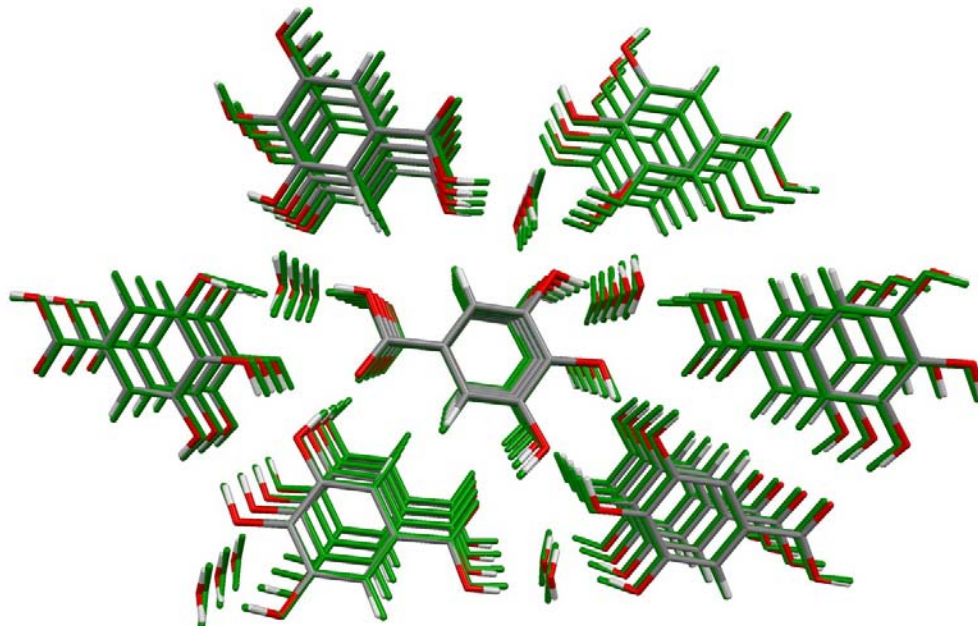

**Figure S6.** Overlay of the observed **MH-I<sup>o</sup>** structure of gallic acid (colored by element and calculated DFT-D structure (green),  $\text{rmsd}_{15}=0.08 \text{ \AA}$ ).

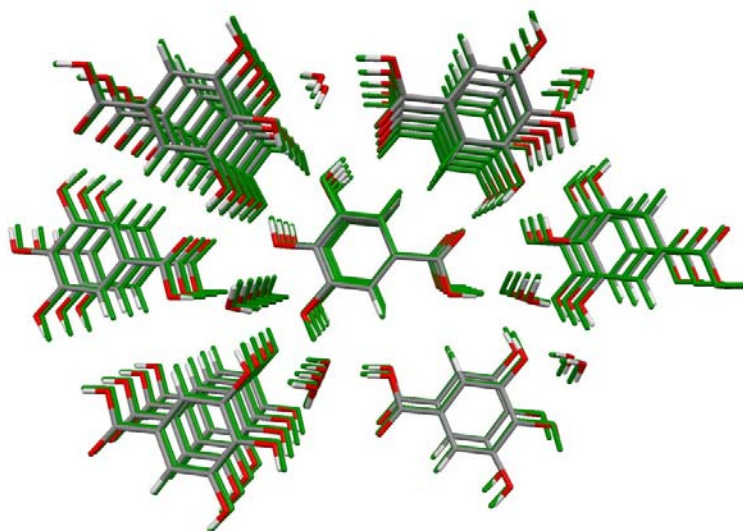

**Figure S7.** Overlay of the observed **MH-II** structure of gallic acid (colored by element and calculated DFT-D structure (green),  $\text{rmsd}_{15}=0.09 \text{ \AA}$ .

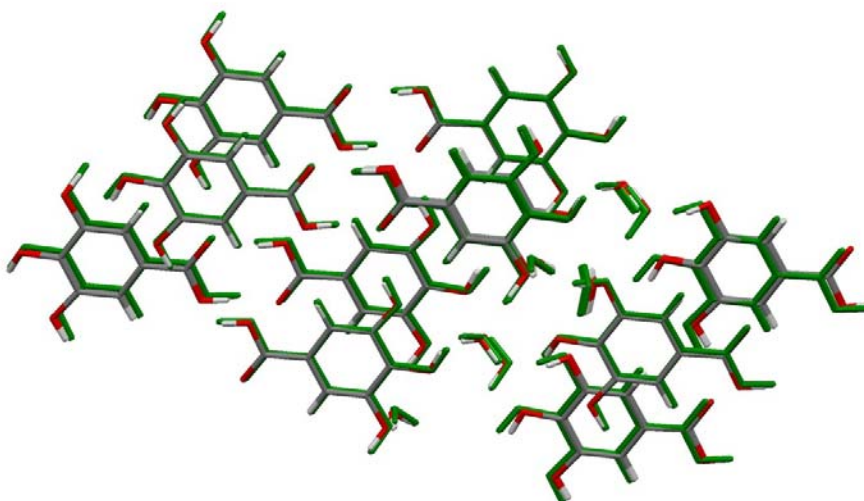

**Figure S8.** Overlay of the observed **MH-III** structure of gallic acid (colored by element and calculated DFT-D structure (green),  $\text{rmsd}_{15}=0.13 \text{ \AA}$ .

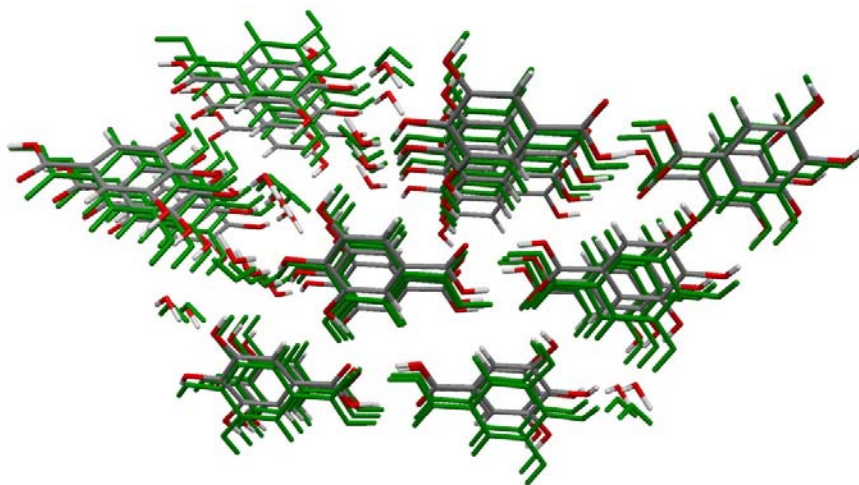

**Figure S9.** Overlay of the observed **MH-IV** structure of gallic acid (colored by element and calculated DFT-D structure (green),  $\text{rmsd}_{15}=0.65 \text{ \AA}$ ).

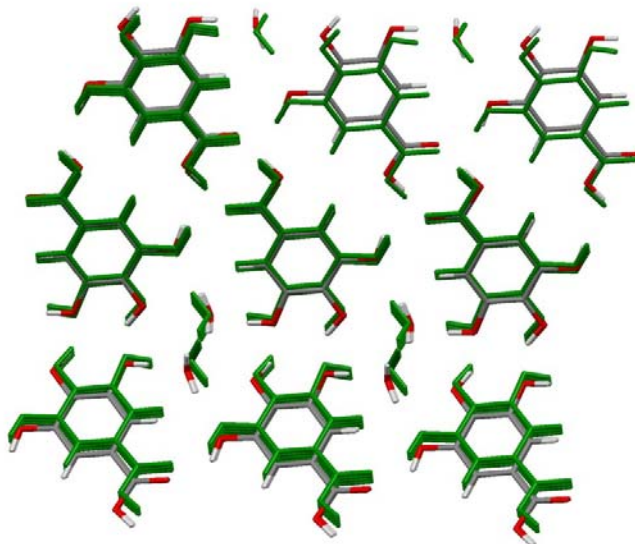

**Figure S10.** Overlay of the observed **MH-V** structure of gallic acid (colored by element and calculated DFT-D structure (green),  $\text{rmsd}_{15}=0.32 \text{ \AA}$ ).

## 1.5 The crystal energy landscapes

**Table S4.** The low-energy crystal structures of gallic acid anhydrates shown on Figure 2b. Experimental structures (incl. structures differing in proton positions) are indicated in bold (Table S2 identifies the experimental structure).

| Structure       | Space group                                                        | Cell parameters |               |               |                 |                |                 | $E_{\text{latt}}/\text{kJ mol}^{-1}$ | density/<br>$\text{g cm}^{-3}$ | H-bonding <sup>a</sup> |
|-----------------|--------------------------------------------------------------------|-----------------|---------------|---------------|-----------------|----------------|-----------------|--------------------------------------|--------------------------------|------------------------|
|                 |                                                                    | a/Å             | b/Å           | c/Å           | $\alpha/^\circ$ | $\beta/^\circ$ | $\gamma/^\circ$ |                                      |                                |                        |
| <b>A12_1180</b> | <b><i>P</i>-1</b>                                                  | <b>11.373</b>   | <b>8.079</b>  | <b>7.571</b>  | <b>87.01</b>    | <b>86.01</b>   | <b>82.22</b>    | <b>-155.69</b>                       | <b>1.650</b>                   | <b>N2</b>              |
| <b>A22_473</b>  | <b><i>P</i>-1</b>                                                  | <b>7.590</b>    | <b>11.413</b> | <b>8.048</b>  | <b>81.83</b>    | <b>93.41</b>   | <b>90.84</b>    | <b>-155.67</b>                       | <b>1.647</b>                   | <b>N2</b>              |
| A23_34          | <i>P2</i> <sub>1</sub> / <i>c</i>                                  | 31.828          | 3.579         | 13.857        | 90              | 56.85          | 90              | -154.96                              | 1.710                          | D2*                    |
| <b>A1_1</b>     | <b><i>C2</i>/<i>c</i></b>                                          | <b>26.276</b>   | <b>4.762</b>  | <b>11.455</b> | <b>90</b>       | <b>108.65</b>  | <b>90</b>       | <b>-154.51</b>                       | <b>1.664</b>                   | <b>N1</b>              |
| <b>A13_20</b>   | <b><i>P</i>-1</b>                                                  | <b>8.425</b>    | <b>7.283</b>  | <b>11.366</b> | <b>99.31</b>    | <b>79.22</b>   | <b>102.54</b>   | <b>-154.45</b>                       | <b>1.703</b>                   | <b>N2</b>              |
| A11_12          | <i>Pbca</i>                                                        | 50.310          | 4.763         | 11.319        | 90              | 90             | 90              | -154.43                              | 1.667                          | N1                     |
| A1_589          | <i>Pbcn</i>                                                        | 25.456          | 4.735         | 11.250        | 90              | 90             | 90              | -154.29                              | 1.667                          | N1                     |
| A11_7           | <i>C2</i> / <i>c</i>                                               | 30.013          | 4.996         | 21.794        | 90              | 54.95          | 90              | -154.13                              | 1.695                          | Nx                     |
| A11_126         | <i>P2</i> <sub>1</sub> / <i>c</i>                                  | 14.960          | 12.182        | 7.325         | 90              | 89.78          | 90              | -153.97                              | 1.702                          | D1                     |
| <b>A12_38</b>   | <b><i>P</i>-1</b>                                                  | <b>8.077</b>    | <b>7.446</b>  | <b>11.835</b> | <b>89.95</b>    | <b>79.33</b>   | <b>87.85</b>    | <b>-153.96</b>                       | <b>1.628</b>                   | <b>N2</b>              |
| A13_7           | <i>P2</i> <sub>1</sub> / <i>c</i>                                  | 7.383           | 10.031        | 17.519        | 90              | 105.71         | 90              | -153.65                              | 1.809                          | C2                     |
| <b>A13_2</b>    | <b><i>P2</i><sub>1</sub>/<i>c</i></b>                              | <b>11.219</b>   | <b>4.909</b>  | <b>24.713</b> | <b>90</b>       | <b>80.79</b>   | <b>90</b>       | <b>-153.41</b>                       | <b>1.682</b>                   | <b>N1</b>              |
| <b>A11_4369</b> | <b><i>P</i>-1</b>                                                  | <b>8.060</b>    | <b>14.915</b> | <b>7.471</b>  | <b>60.96</b>    | <b>87.68</b>   | <b>65.66</b>    | <b>-153.35</b>                       | <b>1.630</b>                   | <b>N2</b>              |
| A1_21           | <i>P</i> -1                                                        | 8.451           | 7.110         | 6.445         | 64.31           | 100.97         | 90.47           | -152.98                              | 1.655                          | D1                     |
| <b>A14_119</b>  | <b><i>Cc</i></b>                                                   | <b>26.943</b>   | <b>4.277</b>  | <b>12.857</b> | <b>90</b>       | <b>65.42</b>   | <b>90</b>       | <b>-152.90</b>                       | <b>1.677</b>                   | <b>N1</b>              |
| A12_2           | <i>P2</i> <sub>1</sub> / <i>c</i>                                  | 3.784           | 11.009        | 35.955        | 90              | 60.33          | 90              | -152.63                              | 1.737                          | other                  |
| A22_152         | <i>Pca</i> <sub>2</sub> <sub>1</sub>                               | 16.597          | 3.619         | 21.279        | 90              | 90             | 90              | -152.57                              | 1.768                          | C1                     |
| A24_21          | <i>P2</i> <sub>1</sub> / <i>c</i>                                  | 22.496          | 3.631         | 16.419        | 90              | 106.06         | 90              | -152.50                              | 1.754                          | C1                     |
| A14_154         | <i>Cc</i>                                                          | 14.246          | 3.656         | 25.779        | 90              | 80.60          | 90              | -152.31                              | 1.706                          | D1                     |
| A12_261         | <i>P</i> -1                                                        | 6.440           | 17.388        | 7.161         | 104.82          | 63.52          | 89.83           | -152.14                              | 1.644                          | D1                     |
| A1_25           | <i>P2</i> <sub>1</sub> / <i>c</i>                                  | 5.356           | 25.962        | 4.803         | 90              | 85.38          | 90              | -152.01                              | 1.697                          | D1                     |
| <b>A3_86</b>    | <b><i>P2</i><sub>1</sub>/<i>c</i></b>                              | <b>4.991</b>    | <b>5.621</b>  | <b>24.228</b> | <b>90</b>       | <b>74.26</b>   | <b>90</b>       | <b>-151.85</b>                       | <b>1.727</b>                   | <b>D1</b>              |
| A33_6           | <i>Pc</i>                                                          | 13.687          | 3.548         | 13.838        | 90              | 73.00          | 90              | -151.63                              | 1.758                          | C2                     |
| <b>A14_132</b>  | <b><i>P2</i><sub>1</sub>/<i>c</i></b>                              | <b>25.147</b>   | <b>4.345</b>  | <b>12.719</b> | <b>90</b>       | <b>78.49</b>   | <b>90</b>       | <b>-151.56</b>                       | <b>1.660</b>                   | <b>N1</b>              |
| A13_31          | <i>P2</i> <sub>1</sub> / <i>c</i>                                  | 7.303           | 10.287        | 16.850        | 90              | 82.95          | 90              | -151.44                              | 1.799                          | C2                     |
| A2_18           | <i>P2</i> <sub>1</sub> / <i>c</i>                                  | 8.665           | 3.677         | 19.953        | 90              | 86.02          | 90              | -151.40                              | 1.782                          | C1                     |
| A2_583          | <i>P</i> -1                                                        | 12.012          | 7.110         | 6.441         | 115.74          | 67.17          | 135.29          | -151.40                              | 1.633                          | D1                     |
| A22_1335        | <i>P</i> -1                                                        | 8.665           | 3.677         | 21.197        | 89.99           | 69.91          | 90.00           | -151.39                              | 1.782                          | C1                     |
| A11_94          | <i>P2</i> <sub>1</sub> / <i>c</i>                                  | 3.745           | 16.090        | 22.638        | 90              | 98.52          | 90              | -151.34                              | 1.675                          | C1*,dx                 |
| A12_5           | <i>P2</i> <sub>1</sub> / <i>c</i>                                  | 3.700           | 29.444        | 11.884        | 90              | 84.70          | 90              | -151.15                              | 1.753                          | other                  |
| A4_30           | <i>P</i> -1                                                        | 7.223           | 7.375         | 7.407         | 108.63          | 113.55         | 62.38           | -150.93                              | 1.787                          | C1                     |
| A12_26          | <i>P2</i> <sub>1</sub> <i>2</i> <sub>1</sub> <i>2</i> <sub>1</sub> | 3.729           | 33.285        | 10.143        | 90              | 90             | 90              | -150.91                              | 1.795                          | C12                    |
| A12_7           | <i>P2</i> <sub>1</sub> / <i>c</i>                                  | 3.556           | 30.277        | 12.173        | 90              | 86.96          | 90              | -150.88                              | 1.727                          | other                  |
| A23_5           | <i>P</i> -1                                                        | 24.428          | 7.390         | 3.660         | 87.12           | 92.21          | 83.43           | -150.87                              | 1.725                          | dx                     |
| A13_98          | <i>C2</i> / <i>c</i>                                               | 52.531          | 3.773         | 13.537        | 90              | 86.38          | 90              | -150.85                              | 1.688                          | dx                     |
| A24_7           | <i>P2</i> <sub>1</sub> <i>2</i> <sub>1</sub> <i>2</i> <sub>1</sub> | 3.594           | 46.506        | 7.827         | 90              | 90             | 90              | -150.83                              | 1.727                          | C1                     |
| A4_1            | <i>Pc</i>                                                          | 6.767           | 3.611         | 13.838        | 90              | 73.18          | 90              | -150.78                              | 1.745                          | C1                     |
| A24_14          | <i>P2</i> <sub>1</sub> <i>2</i> <sub>1</sub> <i>2</i> <sub>1</sub> | 3.590           | 7.831         | 46.531        | 90              | 90             | 90              | -150.70                              | 1.727                          | C1                     |
| A24_141         | <i>P</i> -1                                                        | 7.535           | 12.000        | 7.496         | 90.07           | 82.34          | 77.53           | -150.67                              | 1.724                          | other                  |
| A33_2           | <i>C2</i> / <i>c</i>                                               | 20.977          | 5.383         | 23.980        | 90              | 75.39          | 90              | -150.60                              | 1.725                          | Nx                     |
| A44_5023        | <i>P2</i> <sub>1</sub> / <i>c</i>                                  | 24.961          | 7.943         | 7.698         | 90              | 122.21         | 90              | -150.56                              | 1.750                          | dx                     |
| A4_3            | <i>P2</i> <sub>1</sub> / <i>c</i>                                  | 3.849           | 7.940         | 21.851        | 90              | 104.89         | 90              | -150.54                              | 1.751                          | dx                     |
| A33_53          | <i>P2</i> <sub>1</sub> / <i>c</i>                                  | 7.240           | 17.241        | 10.149        | 90              | 85.79          | 90              | -150.47                              | 1.789                          | C2                     |
| <b>A13_3</b>    | <b><i>P2</i><sub>1</sub>/<i>c</i></b>                              | <b>10.742</b>   | <b>5.191</b>  | <b>24.236</b> | <b>90</b>       | <b>102.14</b>  | <b>90</b>       | <b>-150.43</b>                       | <b>1.711</b>                   | <b>D1</b>              |

| Structure     | Space group                    | Cell parameters |              |               |              |               |              | E <sub>latt</sub> /<br>kJ mol <sup>-1</sup> | density/<br>g cm <sup>-3</sup> | H-bonding <sup>a</sup> |
|---------------|--------------------------------|-----------------|--------------|---------------|--------------|---------------|--------------|---------------------------------------------|--------------------------------|------------------------|
|               |                                | a/Å             | b/Å          | c/Å           | α/°          | β/°           | γ/°          |                                             |                                |                        |
| <b>A13_4</b>  | <b>P2<sub>1</sub>/c</b>        | <b>10.777</b>   | <b>5.176</b> | <b>28.565</b> | <b>90</b>    | <b>123.87</b> | <b>90</b>    | <b>-150.41</b>                              | <b>1.708</b>                   | <b>D1</b>              |
| <b>A2_80</b>  | <b>C2/c</b>                    | <b>27.924</b>   | <b>4.313</b> | <b>12.435</b> | <b>90</b>    | <b>67.14</b>  | <b>90</b>    | <b>-150.32</b>                              | <b>1.637</b>                   | <b>N1</b>              |
| A2_43         | P2 <sub>1</sub> /c             | 8.644           | 10.257       | 7.095         | 90           | 89.43         | 90           | -150.21                                     | 1.796                          | C1                     |
| A2_61         | P3 <sub>1</sub>                | 13.230          | 13.230       | 3.526         | 90           | 90            | 120          | -150.16                                     | 1.586                          | other                  |
| <b>A23_17</b> | <b>P2<sub>1</sub>/c</b>        | <b>11.271</b>   | <b>4.867</b> | <b>30.635</b> | <b>90</b>    | <b>126.54</b> | <b>90</b>    | <b>-150.12</b>                              | <b>1.674</b>                   | <b>N1</b>              |
| A2_49         | P2 <sub>1</sub> /c             | 12.906          | 3.625        | 14.144        | 90           | 76.41         | 90           | -150.05                                     | 1.757                          | C1                     |
| A13_166       | P-1                            | 3.657           | 7.292        | 25.810        | 82.88        | 91.47         | 77.17        | -150.04                                     | 1.699                          | D1                     |
| <b>A13_35</b> | <b>P2<sub>1</sub></b>          | <b>23.572</b>   | <b>5.311</b> | <b>5.265</b>  | <b>90</b>    | <b>92.13</b>  | <b>90</b>    | <b>-150.01</b>                              | <b>1.715</b>                   | <b>D1</b>              |
| A33_5         | Pc                             | 3.573           | 11.733       | 15.564        | 90           | 89.95         | 90           | -149.93                                     | 1.732                          | C2                     |
| A2_1          | C2/c                           | 25.019          | 3.481        | 15.493        | 90           | 111.89        | 90           | -149.91                                     | 1.805                          | other                  |
| A2_192        | P2 <sub>1</sub> /c             | 5.384           | 26.416       | 4.742         | 90           | 95.07         | 90           | -149.90                                     | 1.682                          | D1                     |
| A44_17        | Pc                             | 13.520          | 3.589        | 13.836        | 90           | 73.63         | 90           | -149.83                                     | 1.754                          | L1                     |
| A11_53        | P2 <sub>1</sub> /c             | 3.748           | 22.272       | 16.254        | 90           | 93.90         | 90           | -149.82                                     | 1.669                          | L1*,dx                 |
| A33_19        | P2 <sub>1</sub> /c             | 6.576           | 3.715        | 53.569        | 90           | 91.02         | 90           | -149.80                                     | 1.727                          | dx                     |
| A14_13        | P2 <sub>1</sub> /c             | 26.063          | 3.760        | 13.591        | 90           | 87.27         | 90           | -149.78                                     | 1.699                          | C6*                    |
| A4_167        | P2 <sub>1</sub> /c             | 6.319           | 3.886        | 27.718        | 90           | 104.91        | 90           | -149.75                                     | 1.718                          | D1                     |
| <b>A1_20</b>  | <b>P2<sub>1</sub>/c</b>        | <b>5.461</b>    | <b>5.075</b> | <b>28.963</b> | <b>90</b>    | <b>55.53</b>  | <b>90</b>    | <b>-149.74</b>                              | <b>1.707</b>                   | <b>D1</b>              |
| A22_95        | P2 <sub>1</sub> 2 <sub>1</sub> | 14.280          | 3.563        | 25.108        | 90           | 90            | 90           | -149.72                                     | 1.769                          | other                  |
| A1_60         | P2 <sub>1</sub> /c             | 14.676          | 3.766        | 13.424        | 90           | 71.22         | 90           | -149.71                                     | 1.609                          | Nx                     |
| A24_1311      | P2/c                           | 14.554          | 3.699        | 24.434        | 90           | 95.82         | 90           | -149.71                                     | 1.727                          | Nx                     |
| A3_5          | P2 <sub>1</sub> 2 <sub>1</sub> | 10.872          | 3.615        | 16.724        | 90           | 90            | 90           | -149.70                                     | 1.719                          | C2                     |
| <b>A3_2</b>   | <b>C2/c</b>                    | <b>23.518</b>   | <b>5.354</b> | <b>10.738</b> | <b>90</b>    | <b>101.98</b> | <b>90</b>    | <b>-149.70</b>                              | <b>1.709</b>                   | <b>N1</b>              |
| A14_142       | P-1                            | 14.053          | 7.295        | 7.307         | 63.95        | 89.33         | 77.22        | -149.66                                     | 1.730                          | D1                     |
| A33_21        | Pc                             | 3.582           | 10.926       | 16.982        | 90           | 75.08         | 90           | -149.63                                     | 1.760                          | C2                     |
| A1_171        | P2 <sub>1</sub> /c             | 6.597           | 9.232        | 11.290        | 90           | 92.55         | 90           | -149.60                                     | 1.645                          | dx                     |
| A34_92        | P2 <sub>1</sub> /c             | 3.847           | 16.414       | 21.251        | 90           | 82.26         | 90           | -149.59                                     | 1.700                          | dx*                    |
| A12_90        | P2 <sub>1</sub> 2 <sub>1</sub> | 13.536          | 3.539        | 28.404        | 90           | 90            | 90           | -149.59                                     | 1.661                          | other                  |
| A2_2          | C2/c                           | 23.866          | 3.500        | 15.497        | 90           | 74.58         | 90           | -149.58                                     | 1.811                          | C3                     |
| A1_320        | P2 <sub>1</sub> /c             | 16.802          | 10.128       | 3.727         | 90           | 84.28         | 90           | -149.55                                     | 1.790                          | C2                     |
| <b>A34_1</b>  | <b>P-1</b>                     | <b>5.072</b>    | <b>5.539</b> | <b>23.522</b> | <b>90.40</b> | <b>85.70</b>  | <b>90.12</b> | <b>-149.53</b>                              | <b>1.715</b>                   | <b>D1</b>              |
| A44_32        | Pc                             | 10.939          | 3.585        | 16.423        | 90           | 92.37         | 90           | -149.53                                     | 1.756                          | C1                     |
| A2_3          | P2 <sub>1</sub> /c             | 12.617          | 3.536        | 15.568        | 90           | 112.20        | 90           | -149.51                                     | 1.757                          | C3                     |
| A22_10        | C2/c                           | 46.924          | 3.540        | 15.284        | 90           | 85.29         | 90           | -149.48                                     | 1.786                          | C3                     |
| A12_10        | P2 <sub>1</sub> /c             | 3.749           | 27.464       | 12.885        | 90           | 97.28         | 90           | -149.46                                     | 1.717                          | other                  |
| A1_15         | Pna2 <sub>1</sub>              | 15.560          | 11.667       | 3.720         | 90           | 90            | 90           | -149.43                                     | 1.673                          | C2                     |
| A22_7         | C2/c                           | 46.432          | 3.507        | 15.533        | 90           | 94.05         | 90           | -149.41                                     | 1.791                          | C3                     |
| A14_59        | P1                             | 14.287          | 8.299        | 3.636         | 61.01        | 61.43         | 72.35        | -149.41                                     | 1.713                          | D1                     |
| A22_3         | C2/c                           | 46.848          | 3.482        | 15.547        | 90           | 94.58         | 90           | -149.34                                     | 1.788                          | C3                     |
| A1_13         | Pca2 <sub>1</sub>              | 13.434          | 3.866        | 12.864        | 90           | 90            | 90           | -149.33                                     | 1.691                          | C4                     |
| A4_10         | Pc                             | 7.779           | 3.569        | 14.050        | 90           | 123.34        | 90           | -149.33                                     | 1.734                          | C1                     |
| A14_125       | P2 <sub>1</sub> /c             | 14.585          | 12.340       | 7.288         | 90           | 86.15         | 90           | -149.32                                     | 1.727                          | D1                     |
| A11_184       | C2/c                           | 12.692          | 7.749        | 27.227        | 90           | 94.14         | 90           | -149.31                                     | 1.692                          | D1                     |
| A4_9          | P2 <sub>1</sub>                | 3.576           | 7.770        | 11.741        | 90           | 86.74         | 90           | -149.30                                     | 1.735                          | C1                     |
| A2_105        | P-1                            | 10.240          | 5.887        | 6.781         | 69.90        | 65.25         | 87.92        | -149.28                                     | 1.634                          | D1                     |
| A3_4          | Pna2 <sub>1</sub>              | 10.739          | 16.903       | 3.658         | 90           | 90            | 90           | -149.19                                     | 1.702                          | C2                     |
| A1_49         | P2 <sub>1</sub> /c             | 6.110           | 4.200        | 36.182        | 90           | 46.79         | 90           | -149.14                                     | 1.670                          | D1                     |
| A24_20        | P2 <sub>1</sub> /c             | 22.783          | 3.610        | 16.444        | 90           | 106.40        | 90           | -149.13                                     | 1.742                          | C1                     |
| A22_5         | C2/c                           | 54.108          | 3.513        | 15.302        | 90           | 60.71         | 90           | -149.12                                     | 1.782                          | C3                     |

| Structure      | Space group                    | Cell parameters |              |               |                 |                |                 | $E_{\text{lat}}/\text{kJ mol}^{-1}$ | density/<br>$\text{g cm}^{-3}$ | H-bonding <sup>a</sup> |
|----------------|--------------------------------|-----------------|--------------|---------------|-----------------|----------------|-----------------|-------------------------------------|--------------------------------|------------------------|
|                |                                | a/Å             | b/Å          | c/Å           | $\alpha/^\circ$ | $\beta/^\circ$ | $\gamma/^\circ$ |                                     |                                |                        |
| A4_73          | <i>Cc</i>                      | 10.156          | 8.626        | 7.221         | 90              | 85.45          | 90              | -149.07                             | 1.792                          | C1                     |
| A4_44          | <i>P2<sub>1</sub>/c</i>        | 7.312           | 8.617        | 10.073        | 90              | 86.25          | 90              | -149.05                             | 1.784                          | C1                     |
| A2_6           | <i>P2<sub>1</sub>/c</i>        | 12.071          | 3.498        | 15.649        | 90              | 75.93          | 90              | -149.04                             | 1.763                          | C3                     |
| A23_47         | <i>P2<sub>1</sub>/c</i>        | 27.399          | 3.609        | 13.980        | 90              | 76.68          | 90              | -148.95                             | 1.680                          | dx                     |
| A22_22         | <i>C2/c</i>                    | 30.388          | 3.539        | 25.483        | 90              | 67.23          | 90              | -148.85                             | 1.789                          | C3                     |
| A4_107         | <i>C2/c</i>                    | 23.698          | 4.508        | 12.816        | 90              | 96.11          | 90              | -148.84                             | 1.660                          | Nx                     |
| A23_40         | <i>P2<sub>1</sub>/c</i>        | 26.717          | 3.604        | 13.752        | 90              | 90.29          | 90              | -148.72                             | 1.707                          | dx                     |
| A44_175        | <i>P-1</i>                     | 8.616           | 7.390        | 14.979        | 70.34           | 124.39         | 125.50          | -148.65                             | 1.764                          | C1                     |
| A23_294        | <i>P2<sub>1</sub>/c</i>        | 5.398           | 51.910       | 4.733         | 90              | 84.78          | 90              | -148.61                             | 1.711                          | D1*                    |
| A1_327         | <i>P-1</i>                     | 7.474           | 7.260        | 7.055         | 110.64          | 93.88          | 100.00          | -148.60                             | 1.617                          | dx                     |
| A2_15          | <i>P2<sub>1</sub>/c</i>        | 3.572           | 24.307       | 8.098         | 90              | 66.52          | 90              | -148.59                             | 1.752                          | C2                     |
| A2_155         | <i>P2<sub>1</sub>/c</i>        | 11.958          | 6.517        | 8.469         | 90              | 82.28          | 90              | -148.58                             | 1.728                          | C2                     |
| A4_52          | <i>P2<sub>1</sub>/c</i>        | 7.225           | 8.626        | 10.199        | 90              | 85.42          | 90              | -148.56                             | 1.783                          | C1                     |
| A22_11         | <i>C2/c</i>                    | 25.227          | 3.506        | 30.577        | 90              | 68.10          | 90              | -148.55                             | 1.801                          | C3                     |
| <b>A23_22</b>  | <b><i>P2<sub>1</sub>/c</i></b> | <b>24.211</b>   | <b>5.216</b> | <b>10.714</b> | <b>90</b>       | <b>79.05</b>   | <b>90</b>       | <b>-148.51</b>                      | <b>1.701</b>                   | <b>D1</b>              |
| <b>A23_927</b> | <b><i>Cc</i></b>               | <b>24.927</b>   | <b>4.266</b> | <b>12.852</b> | <b>90</b>       | <b>90.71</b>   | <b>90</b>       | <b>-148.44</b>                      | <b>1.654</b>                   | <b>N1</b>              |
| A13_10         | <i>P-1</i>                     | 10.740          | 3.821        | 16.611        | 83.09           | 90.71          | 108.74          | -148.44                             | 1.764                          | C2                     |
| A44_6055       | <i>Pc</i>                      | 10.863          | 3.592        | 16.511        | 90              | 88.32          | 90              | -148.42                             | 1.755                          | C1                     |
| A24_228        | <i>P2<sub>1</sub>/c</i>        | 30.068          | 3.651        | 13.779        | 90              | 116.61         | 90              | -148.42                             | 1.671                          | D2                     |
| A3_11          | <i>P2<sub>1</sub>/c</i>        | 4.021           | 10.110       | 17.553        | 90              | 113.30         | 90              | -148.39                             | 1.724                          | C1                     |
| A2_11          | <i>P-1</i>                     | 11.213          | 3.730        | 8.357         | 103.57          | 106.96         | 88.06           | -148.36                             | 1.739                          | dx                     |
| A2_9           | <i>P2<sub>1</sub>/c</i>        | 24.669          | 3.516        | 7.589         | 90              | 79.32          | 90              | -148.31                             | 1.747                          | C3                     |
| A23_20         | <i>P2<sub>1</sub>/c</i>        | 26.493          | 3.609        | 13.853        | 90              | 89.70          | 90              | -148.19                             | 1.706                          | C6*                    |

<sup>a</sup>Classification according to Figure 2d. Structures marked with an asterisk (\*): only part of the structure forms the specified H-bonding motif.

**Table S5.** The low-energy crystal structures of gallic acid monohydrate shown on Figure 2a. Experimental structures (incl. structures differing in proton positions) are indicated in bold (Table S2 identifies the experimental structure).

| Structure      | Space group                                                  | Cell parameters |              |               |                 |                |                 | $E_{\text{latt}}/\text{kJ mol}^{-1}$ | density/<br>$\text{g cm}^{-3}$ | H-bonding <sup>a</sup> |
|----------------|--------------------------------------------------------------|-----------------|--------------|---------------|-----------------|----------------|-----------------|--------------------------------------|--------------------------------|------------------------|
|                |                                                              | a/Å             | b/Å          | c/Å           | $\alpha/^\circ$ | $\beta/^\circ$ | $\gamma/^\circ$ |                                      |                                |                        |
| H3_314         | <i>P</i> -1                                                  | 3.777           | 6.343        | 15.300        | 98.57           | 84.31          | 86.16           | -236.55                              | 1.738                          | D1                     |
| H2_246         | <i>P</i> <sub>2</sub> / <i>c</i>                             | 10.676          | 3.487        | 19.402        | 90              | 89.01          | 90              | -236.17                              | 1.730                          | C1                     |
| <b>H2_104</b>  | <b><i>P</i><sub>2</sub>/<i>c</i></b>                         | <b>9.598</b>    | <b>3.461</b> | <b>21.363</b> | <b>90</b>       | <b>88.61</b>   | <b>90</b>       | <b>-235.75</b>                       | <b>1.761</b>                   | <b>C1</b>              |
| H2_1607        | <i>C</i> <sub>2</sub> / <i>c</i>                             | 19.433          | 3.563        | 20.866        | 90              | 86.98          | 90              | -235.13                              | 1.732                          | C1                     |
| H3_324         | <i>P</i> <sub>2</sub> / <i>c</i>                             | 3.700           | 30.334       | 6.453         | 90              | 87.37          | 90              | -234.86                              | 1.727                          | D1                     |
| <b>H4_1904</b> | <b><i>P</i><sub>2</sub>/<i>c</i></b>                         | <b>7.569</b>    | <b>3.815</b> | <b>25.019</b> | <b>90</b>       | <b>98.64</b>   | <b>90</b>       | <b>-234.49</b>                       | <b>1.750</b>                   | <b>D1</b>              |
| H4_1510        | <i>P</i> -1                                                  | 6.399           | 15.441       | 3.733         | 94.66           | 93.52          | 96.09           | -232.67                              | 1.713                          | D1                     |
| H1_1563        | <i>P</i> <sub>2</sub> / <i>c</i>                             | 5.049           | 14.618       | 10.064        | 90              | 87.45          | 90              | -232.57                              | 1.684                          | dx                     |
| H3_914         | <i>P</i> <sub>2</sub> / <i>n</i>                             | 30.296          | 3.642        | 6.644         | 90              | 84.60          | 90              | -232.48                              | 1.712                          | D2                     |
| H1_40          | <i>P</i> -1                                                  | 3.541           | 6.830        | 15.818        | 76.08           | 76.76          | 86.31           | -232.35                              | 1.729                          | D1                     |
| <b>H3_933</b>  | <b><i>P</i><sub>2</sub>/<i>c</i></b>                         | <b>6.378</b>    | <b>3.972</b> | <b>35.269</b> | <b>90</b>       | <b>57.17</b>   | <b>90</b>       | <b>-231.69</b>                       | <b>1.664</b>                   | <b>D1</b>              |
| H4_423         | <i>P</i> -1                                                  | 10.924          | 6.926        | 16.136        | 115.02          | 41.35          | 78.34           | -231.58                              | 1.722                          | D1                     |
| H4_707         | <i>P</i> <sub>2</sub> / <i>n</i>                             | 6.429           | 29.835       | 3.705         | 90              | 86.89          | 90              | -231.57                              | 1.761                          | C5                     |
| H3_1046        | <i>P</i> <sub>2</sub> / <i>c</i>                             | 4.098           | 29.537       | 7.599         | 90              | 126.80         | 90              | -231.51                              | 1.697                          | D1                     |
| H4_458         | <i>P</i> <sub>2</sub> / <i>c</i>                             | 3.707           | 30.573       | 6.471         | 90              | 87.48          | 90              | -231.26                              | 1.706                          | D1                     |
| H1_2944        | <i>P</i> <sub>2</sub> / <i>c</i>                             | 15.437          | 3.483        | 14.122        | 90              | 102.04         | 90              | -231.21                              | 1.683                          | D2                     |
| H3_49          | <i>P</i> -1                                                  | 7.019           | 6.388        | 8.958         | 87.58           | 75.20          | 68.74           | -230.98                              | 1.729                          | D1                     |
| <b>H2_465</b>  | <b><i>P</i><sub>2</sub>/<i>c</i></b>                         | <b>9.376</b>    | <b>3.584</b> | <b>21.748</b> | <b>90</b>       | <b>99.45</b>   | <b>90</b>       | <b>-230.97</b>                       | <b>1.733</b>                   | <b>C1</b>              |
| <b>H1_2249</b> | <b><i>P</i><sub>2</sub>/<i>n</i></b>                         | <b>30.773</b>   | <b>3.704</b> | <b>6.513</b>  | <b>90</b>       | <b>88.06</b>   | <b>90</b>       | <b>-230.94</b>                       | <b>1.684</b>                   | <b>D1</b>              |
| H4_280         | <i>P</i> -1                                                  | 3.649           | 15.021       | 6.750         | 87.22           | 87.39          | 95.63           | -230.89                              | 1.701                          | D1                     |
| H2_538         | <i>I</i> <sub>2</sub> / <i>a</i>                             | 18.728          | 3.509        | 21.893        | 90              | 87.28          | 90              | -230.86                              | 1.739                          | C1                     |
| H1_1850        | <i>C</i> <sub>2</sub> / <i>c</i>                             | 10.730          | 7.532        | 22.699        | 90              | 127.05         | 90              | -230.80                              | 1.707                          | D1                     |
| H2_3283        | <i>P</i> <sub>2</sub> / <i>c</i>                             | 13.331          | 3.575        | 21.392        | 90              | 45.47          | 90              | -230.74                              | 1.719                          | C1                     |
| H2_4956        | <i>A</i> <sub>2</sub> / <i>n</i>                             | 20.294          | 3.644        | 19.580        | 90              | 87.18          | 90              | -230.72                              | 1.728                          | C1                     |
| H2_3508        | <i>P</i> <sub>2</sub> / <i>c</i>                             | 5.065           | 14.668       | 10.057        | 90              | 87.63          | 90              | -230.67                              | 1.674                          | dx                     |
| H4_1519        | <i>C</i> <i>c</i>                                            | 3.673           | 29.906       | 6.483         | 90              | 87.51          | 90              | -230.34                              | 1.757                          | C5                     |
| H1_1373        | <i>C</i> <sub>2</sub> / <i>c</i>                             | 31.389          | 3.465        | 14.113        | 90              | 75.26          | 90              | -230.34                              | 1.684                          | D1                     |
| <b>H2_1987</b> | <b><i>P</i><sub>2</sub>/<i>c</i></b>                         | <b>9.292</b>    | <b>3.591</b> | <b>21.909</b> | <b>90</b>       | <b>93.06</b>   | <b>90</b>       | <b>-230.28</b>                       | <b>1.712</b>                   | <b>C1</b>              |
| <b>MH4</b>     | <b><i>P</i>-1</b>                                            | <b>7.043</b>    | <b>7.543</b> | <b>30.487</b> | <b>87.20</b>    | <b>83.26</b>   | <b>68.86</b>    | <b>-230.24</b>                       | <b>1.687</b>                   | <b>D1</b>              |
| H1_325         | <i>P</i> <sub>2</sub> / <i>c</i>                             | 3.878           | 30.613       | 7.139         | 90              | 60.97          | 90              | -230.01                              | 1.686                          | D1                     |
| H3_1273        | <i>P</i> <sub>2</sub> / <i>c</i>                             | 4.102           | 6.324        | 33.599        | 90              | 119.24         | 90              | -229.76                              | 1.643                          | D1                     |
| H1_21          | <i>F</i> <i>dd</i> <sub>2</sub>                              | 30.603          | 27.050       | 3.614         | 90              | 90             | 90              | -229.75                              | 1.671                          | dx                     |
| <b>H2_312</b>  | <b><i>P</i><sub>2</sub>/<i>n</i></b>                         | <b>14.853</b>   | <b>3.488</b> | <b>14.125</b> | <b>90</b>       | <b>81.49</b>   | <b>90</b>       | <b>-229.70</b>                       | <b>1.727</b>                   | <b>C1</b>              |
| H4_2142        | <i>P</i> <sub>2</sub> / <i>c</i>                             | 3.625           | 6.662        | 30.108        | 90              | 81.60          | 90              | -229.44                              | 1.737                          | C5                     |
| H2_239         | <i>P</i> -1                                                  | 6.882           | 16.018       | 3.531         | 105.45          | 94.00          | 77.59           | -229.42                              | 1.705                          | D1                     |
| H2_2871        | <i>P</i> <sub>2</sub> / <i>n</i>                             | 14.596          | 3.482        | 14.094        | 90              | 94.62          | 90              | -229.36                              | 1.750                          | C1                     |
| H3_66          | <i>P</i> <sub>2</sub> <sub>1</sub> <sub>2</sub> <sub>1</sub> | 7.555           | 25.157       | 3.746         | 90              | 90             | 90              | -229.23                              | 1.755                          | C5                     |
| H2_76          | <i>P</i> -1                                                  | 3.491           | 10.680       | 9.844         | 86.80           | 96.79          | 97.93           | -229.22                              | 1.732                          | C1                     |

| Structure      | Space group                                     | Cell parameters |              |               |                 |                |                 | $E_{\text{lat}}/\text{kJ mol}^{-1}$ | density/<br>$\text{g cm}^{-3}$ | H-bonding <sup>a</sup> |
|----------------|-------------------------------------------------|-----------------|--------------|---------------|-----------------|----------------|-----------------|-------------------------------------|--------------------------------|------------------------|
|                |                                                 | a/Å             | b/Å          | c/Å           | $\alpha/^\circ$ | $\beta/^\circ$ | $\gamma/^\circ$ |                                     |                                |                        |
| H4_321         | <i>C2/c</i>                                     | 30.538          | 3.830        | 14.223        | 90              | 115.40         | 90              | -229.19                             | 1.663                          | D1                     |
| H1_592         | <i>P2<sub>1</sub>/c</i>                         | 14.461          | 7.485        | 7.060         | 90              | 86.49          | 90              | -229.14                             | 1.638                          | D1                     |
| H1_1876        | <i>A2/a</i>                                     | 14.481          | 3.487        | 30.395        | 90              | 78.82          | 90              | -228.97                             | 1.660                          | D1                     |
| H3_255         | <i>P2<sub>1</sub>/c</i>                         | 3.768           | 6.526        | 29.673        | 90              | 92.22          | 90              | -228.86                             | 1.714                          | D1                     |
| H3_1687        | <i>P2<sub>1</sub>/n</i>                         | 4.218           | 29.218       | 6.123         | 90              | 87.04          | 90              | -228.72                             | 1.658                          | D1                     |
| H2_6823        | <i>C2/c</i>                                     | 31.885          | 3.471        | 14.087        | 90              | 74.06          | 90              | -228.65                             | 1.667                          | D1                     |
| H2_326         | <i>P2<sub>1</sub>/c</i>                         | 9.957           | 3.697        | 19.638        | 90              | 95.19          | 90              | -228.64                             | 1.736                          | C1                     |
| H1_4516        | <i>P2<sub>1</sub>/c</i>                         | 4.600           | 14.723       | 10.994        | 90              | 80.97          | 90              | -228.62                             | 1.670                          | dx                     |
| H3_115         | <i>C2/c</i>                                     | 30.637          | 3.843        | 13.908        | 90              | 64.97          | 90              | -228.57                             | 1.685                          | D1                     |
| H2_413         | <i>A2/n</i>                                     | 19.142          | 3.569        | 21.183        | 90              | 86.11          | 90              | -228.54                             | 1.731                          | C1                     |
| H2_3215        | <i>P2<sub>1</sub>/c</i>                         | 15.782          | 3.597        | 13.347        | 90              | 99.03          | 90              | -228.43                             | 1.670                          | D2                     |
| H1_478         | <i>P2<sub>1</sub>/c</i>                         | 15.660          | 3.576        | 13.511        | 90              | 79.75          | 90              | -228.35                             | 1.678                          | D2                     |
| H4_877         | <i>P2<sub>1</sub>/c</i>                         | 6.599           | 3.690        | 30.329        | 90              | 79.69          | 90              | -228.32                             | 1.720                          | C6                     |
| H2_2237        | <i>C2/c</i>                                     | 30.553          | 3.483        | 14.324        | 90              | 79.70          | 90              | -228.32                             | 1.666                          | D1                     |
| H4_19          | <i>P2<sub>1</sub>/c</i>                         | 13.733          | 3.834        | 14.016        | 90              | 89.22          | 90              | -228.32                             | 1.693                          | C6                     |
| H4_948         | <i>Pca2<sub>1</sub></i>                         | 29.883          | 3.607        | 6.675         | 90              | 90             | 90              | -228.31                             | 1.737                          | C5                     |
| <b>H4_1532</b> | <b><i>P2<sub>1</sub>/c</i></b>                  | <b>9.542</b>    | <b>3.542</b> | <b>21.416</b> | <b>90</b>       | <b>92.11</b>   | <b>90</b>       | <b>-228.20</b>                      | <b>1.728</b>                   | <b>C1</b>              |
| H4_213         | <i>C2/c</i>                                     | 25.663          | 4.005        | 15.498        | 90              | 111.58         | 90              | -228.20                             | 1.687                          | N1                     |
| H3_284         | <i>P-1</i>                                      | 4.328           | 11.157       | 7.682         | 82.47           | 79.46          | 78.49           | -228.17                             | 1.757                          | D1                     |
| H1_667         | <i>P2<sub>1</sub>2<sub>1</sub>2<sub>1</sub></i> | 14.690          | 13.837       | 3.700         | 90              | 90             | 90              | -227.98                             | 1.661                          | C6                     |
| H4_836         | <i>P2/c</i>                                     | 6.664           | 3.594        | 30.604        | 90              | 96.39          | 90              | -227.98                             | 1.715                          | D2                     |
| H1_259         | <i>P2<sub>1</sub>/c</i>                         | 15.349          | 3.474        | 14.304        | 90              | 74.96          | 90              | -227.96                             | 1.697                          | C6                     |
| H3_610         | <i>P-1</i>                                      | 3.648           | 43.065       | 7.538         | 119.11          | 63.75          | 59.78           | -227.77                             | 1.690                          | D1                     |
| H4_1468        | <i>P-1</i>                                      | 7.608           | 11.490       | 4.324         | 79.29           | 78.13          | 92.80           | -227.64                             | 1.726                          | D1                     |
| H1_2304        | <i>P2<sub>1</sub>2<sub>1</sub>2<sub>1</sub></i> | 18.647          | 3.647        | 10.744        | 90              | 90             | 90              | -227.63                             | 1.710                          | C2                     |
| H3_1377        | <i>P-1</i>                                      | 9.581           | 6.256        | 7.500         | 58.46           | 99.88          | 84.20           | -227.58                             | 1.670                          | D1                     |
| H2_1812        | <i>Fdd2</i>                                     | 30.293          | 9.452        | 10.099        | 90              | 90             | 90              | -227.54                             | 1.728                          | dx                     |
| H3_4227        | <i>P2<sub>1</sub>/a</i>                         | 8.621           | 11.799       | 7.294         | 90              | 90.09          | 90              | -227.06                             | 1.684                          | dx                     |
| H3_128         | <i>P2<sub>1</sub>/c</i>                         | 3.605           | 29.486       | 7.849         | 90              | 120.33         | 90              | -226.78                             | 1.735                          | C5                     |
| H2_841         | <i>P2/c</i>                                     | 15.333          | 3.580        | 13.815        | 90              | 74.43          | 90              | -226.57                             | 1.711                          | D1                     |

<sup>a</sup>Classification according to Figure 2c.

The hypothetical anhydrate and monohydrate crystal structures are available in \*.res from the authors on request.



## 2 EXPERIMENTAL

### 2.1 Materials

Gallic acid (purity  $\geq 97.5\%$ ) was purchased from Sigma. The compound was recrystallized for purification from a hot saturated ethanol solution at 25 °C and desolvated in a drying oven at 80 °C. For the solvent screens a set of 29 solvents was chosen, which were all of analytical quality and all organic solvents were purchased from Aldrich or Fluka. The set of solvents was methanol, ethanol, 1-propanol, 2-propanol, 1-butanol, 2-butanol, toluene, xylene, hexane, cyclohexane, dichloromethane, dichloroethane, chloroform, ethyl methyl ketone, acetone, diethyl ether, diisopropyl ether, cyclohexanone, 1,4-dioxane, tetrahydrofuran, ethyl acetate, acetic acid, formic acid, acetonitrile, nitromethane, pyridine, dimethyl formamide, dimethyl sulfoxide and water.

## 2.2 Solid form screen

### 2.2.1 Solvent Screen

Crystallization experiments included fast and slow solvent evaporation, cooling crystallization and solvent-mediated transformation. Mixed solvents (2<sup>nd</sup> solvent) contained a 1:1 ratio of the two solvents. In total more than 165 solvent crystallization conditions were explored mainly at room temperature (RT). The crystallization products were identified with hot-stage microscopy, IR spectroscopy and powder X-ray diffractometry.

**Table S6.** Results of gallic acid solid form screen: solvent mediated transformation experiments<sup>a</sup> (II° - anhydrate form II°, MH-I° – monohydrate form I°, S-Dx2 – dioxane disolvate, S-Dx-H dioxane-water solvate).

| Solvent                | Solid Form                                  | Solvent (mixture)        | Solid Form                               |
|------------------------|---------------------------------------------|--------------------------|------------------------------------------|
| 1-Butanol              | II°                                         |                          |                                          |
| 1-Propanol             | II°                                         | 1-propanol+water         | MH-I°                                    |
| 2-Butanol              | II°                                         |                          |                                          |
| 2-Propanol             | II°                                         | 2-propanol+water         | MH-I°                                    |
| Acetic acid            | II°                                         | acetic acid+Water        | MH-I°                                    |
| Acetone                | II°                                         | acetone+water            | MH-I°                                    |
| Acetonitrile           | II°                                         | acetonitrile+water       | MH-I°                                    |
| Cyclohexane            | II°                                         |                          |                                          |
| Chloroform             | II°                                         |                          |                                          |
| Dichloroethane         | II°                                         |                          |                                          |
| Dichloromethane        | II°                                         |                          |                                          |
| Diethyl ether          | II°                                         |                          |                                          |
| Dimethyl formamide     | Solvates <sup>b</sup> (DMF1 > DMF2, DMF4)   | dimethyl formamide+water | Solvates <sup>b</sup> (DMF2, DMF3, DMF4) |
| Dimethyl sulfoxide     | Solvates <sup>b</sup> (DMSO1, DMSO3, DMSO4) | dimethyl sulfoxide+water | Solvates <sup>b</sup> (DMSO3, DMSO4)     |
| Diisopropyl ether      | II°                                         |                          |                                          |
| 1,4-Dioxane            | S-Dx2                                       | 1,4-dioxane+water        | S-Dx-H                                   |
| Ethyl methyl ketone    | II°                                         |                          |                                          |
| Ethyl acetate          | II°                                         |                          |                                          |
| Ethanol                | II°                                         | ethanol+water            | MH-I°                                    |
| Formic acid            | II°                                         |                          |                                          |
| Hexane                 | II°                                         |                          |                                          |
| Methanol               | II°                                         | methanol+water           | MH-I°                                    |
| Nitromethane           | II°                                         |                          |                                          |
| Pyridine               | II°                                         |                          |                                          |
| Tetrahydrofurane (THF) | II°                                         | THF+water                | MH-I°                                    |
| Toluene                | II°                                         |                          |                                          |
| Water                  | MH-I°                                       |                          |                                          |
| Xylene                 | II°                                         |                          |                                          |

<sup>a</sup>Anhydrous gallic acid and few drops of solvent were ground in a Retsch grinding mill MM 200 for 10 minutes. <sup>b</sup>See Table S10.

**Table S7.** Results of gallic acid solid form screen: fast evaporation experiments<sup>a</sup> (S<sub>X-H</sub> – isostructural heterosolvates containing one mole water per mole gallic acid, MH – monohydrates, S-DMF and S-DMSO – solvates containing dimethyl formamide or dimethylsulfoxide, II° – anhydrate form II°, III – anhydrate form III, THF – tetrahydrofurane).

| Solvent             | Solid Form <sup>b</sup>                               | 2 <sup>nd</sup> solvent water<br>Solid Form                              | 2 <sup>nd</sup> solvent THF<br>Solid Form | 2 <sup>nd</sup> solvent toluene<br>Solid Form                               |
|---------------------|-------------------------------------------------------|--------------------------------------------------------------------------|-------------------------------------------|-----------------------------------------------------------------------------|
| 1-Butanol           | S <sub>X-H</sub> (MH-III)<br>MH-IV                    | n.a.                                                                     | MH-I°                                     | n.a.                                                                        |
| 1-Propanol          | S <sub>X-H</sub> (MH-III)<br>MH-IV<br>MH-I°           | MH-II                                                                    | n.a.                                      | MH-III<br>MH-V                                                              |
| 2-Butanol           | MH-V<br>S <sub>X-H</sub> (MH-III)<br>MH-IV            | n.a.                                                                     | MH-III<br>MH-V                            | n.a.                                                                        |
| 2-Propanol          | S <sub>X-H</sub> (MH-III)<br>MH-IV<br>MH-I°           | MH-I°                                                                    | n.a.                                      | n.a.                                                                        |
| Acetic acid         | S <sub>X-H</sub> (MH-III)<br>MH-I°                    | S <sub>X-H</sub><br>MH-I°                                                | n.a.                                      | n.a.                                                                        |
| Acetone             | S <sub>X-H</sub> (MH-III)<br>MH-II<br>MH-I°           | MH-II<br>MH-I°                                                           | n.a.                                      | n.a.                                                                        |
| Acetonitrile        | S <sub>X-H</sub><br>MH-I°                             | MH-II<br>MH-I°                                                           | n.a.                                      | n.a.                                                                        |
| Dimethyl formamide  | S-DMF1<br>S-DMF2                                      | S-DMF1<br>S-DMF2<br>S-DMF1 (85) <sup>b</sup><br>S-DMF4 (85) <sup>b</sup> | n.a.                                      | n.a.                                                                        |
| Dimethyl sulfoxide  | S-DMSO2                                               | S-DMSO4<br>S-DMSO2                                                       | n.a.                                      | n.a.                                                                        |
| 1,4-Dioxane         | S <sub>X-H</sub>                                      | S <sub>Dx-0.5</sub><br>MH-I°                                             | n.a.                                      | n.a.                                                                        |
| Ethyl methyl ketone | MH-IV<br>S <sub>X-H</sub>                             | n.a.                                                                     | S <sub>X-H</sub>                          | n.a.                                                                        |
| Ethyl acetate       | MH-I°<br>S <sub>X-H</sub>                             | n.a.                                                                     | n.a.                                      | n.a.                                                                        |
| Ethanol             | S <sub>X-H</sub> (MH-III)                             | S <sub>X-H</sub><br>MH-I°<br>MH-II<br>MH-III                             | MH-IV                                     | S <sub>X-H</sub><br>MH-IV<br>II° (85) <sup>b</sup><br>III (85) <sup>b</sup> |
| Formic acid         | MH-I°                                                 | n.a.                                                                     | n.a.                                      | n.a.                                                                        |
| Methanol            | S <sub>X-H</sub> (MH-III)<br>MH-I°<br>MH-II<br>MH-III | MH-I°<br>MH-II                                                           | n.a.                                      | S <sub>X-H</sub><br>MH-IV<br>MH-II<br>MH-I°                                 |
| Tetrahydrofurane    | S <sub>X-H</sub><br>MH-IV                             | n.a.                                                                     | n.a.                                      | n.a.                                                                        |
| Water               | MH-II<br>(MH-I°)                                      | MH-II<br>(MH-I°)                                                         | MH-I°<br>MH-II                            | n.a.                                                                        |
| Toluene             | Not soluble                                           | n.a.                                                                     | II°                                       | n.a.                                                                        |

<sup>a</sup>A saturated solution (at RT) of anhydrous gallic acid was filtered and the solvent was evaporated from a watch glass at RT. <sup>b</sup>Evaporation temperature (° C) as stated in parenthesis, desolvation/dehydration product; <sup>b</sup>see Table S10; n.a. – not attempted.

**Table S8.** Results of gallic acid solid form screen: slow evaporation experiments<sup>a</sup> ( $S_{X-H}$  – isostructural heterosolvates containing one mole water per mole gallic acid, MH – monohydrates, S-DMF and S-DMSO – solvates containing dimethyl formamide or dimethylsulfoxide,  $II^\circ$  – anhydrate form  $II^\circ$ , III – anhydrate form III, THF – tetrahydrofurane).

| Solvent             | Solid Form <sup>b</sup>                       | 2 <sup>nd</sup> solvent water<br>Solid Form | 2 <sup>nd</sup> solvent THF<br>Solid Form | 2 <sup>nd</sup> solvent toluene<br>Solid Form    |
|---------------------|-----------------------------------------------|---------------------------------------------|-------------------------------------------|--------------------------------------------------|
| 1-Butanol           | MH-IV                                         | n.a.                                        | MH-IV                                     | $II^\circ$<br>MH-IV, $S_{X-H}$                   |
| 1-Propanol          | $S_{X-H}$                                     | MH-II                                       | n.a.                                      | MH- $I^\circ$ , MH-IV                            |
| 2-Butanol           | MH-III ( $S_{X-H}$ )                          | n.a.                                        | $II^\circ$                                | MH-III<br>$II^\circ$                             |
| 2-Propanol          | MH- $I^\circ$ , MH-IV                         | MH- $I^\circ$                               | n.a.                                      | $II^\circ$                                       |
| Acetic acid         | MH- $I^\circ$                                 | $II^\circ$                                  | MH- $I^\circ$ , MH-II                     | MH- $I^\circ$ , MH-II                            |
| Acetone             | $S_{X-H}$ (MH-III)<br>MH- $I^\circ$           | n.a.                                        | n.a.                                      | $II^\circ$<br>$S_{X-H}$                          |
| Acetonitrile        | MH- $I^\circ$<br>MH-IV                        | MH-II<br>MH- $I^\circ$                      | $II^\circ$<br>$S_{Dx-2}$ , MH- $I^\circ$  | $II^\circ$<br>$S_{X-H}$ , MH-III                 |
| Chloroform          | n.a.                                          | n.a.                                        | $II^\circ$                                | $II^\circ$<br>$S_{X-H}$                          |
| Cyclohexane         | n.a.                                          | n.a.                                        | $II^\circ$                                |                                                  |
| Dichloroethane      | n.a.                                          | n.a.                                        | $II^\circ$                                | $II^\circ$                                       |
| Dichloromethane     | n.a.                                          | n.a.                                        | $II^\circ$<br>(III)                       | MH- $I^\circ$<br>$S_{X-H}$                       |
| Diethyl ether       | n.a.                                          | n.a.                                        |                                           | $II^\circ$                                       |
| Diisopropyl ether   | n.a.                                          | n.a.                                        | $II^\circ$<br>$S_{Dx-2}$                  | $II^\circ$                                       |
| Dimethyl formamide  | S-DMF 4                                       | n.a.                                        | n.a.                                      | n.a.                                             |
| Dimethyl sulfoxide  | DMSO1,<br>DMSO2                               | n.a.                                        | n.a.                                      | n.a.                                             |
| 1,4-Dioxane         | $S_{Dx-2}$ , $SD_{x-0.5}$<br>$S_{X-H}$        | MH- $I^\circ$<br>MH-III                     | n.a.                                      | $S_{Dx-2}$ , $S_{Dx-0.5}$<br>$S_{X-H}$           |
| Ethyl methyl ketone | $S_{X-H}$ (MH-III)<br>$II^\circ$              | n.a.                                        | $II^\circ$<br>$S_{Dx-2}$                  | $II^\circ$<br>$S_{Dx-2}$                         |
| Ethyl acetate       | MH-IV<br>MH-IV<br>MH-II                       | n.a.                                        | $II^\circ$                                | $II^\circ$<br>MH-III                             |
| Ethanol             | $S_{X-H}$ (MH-III)<br>MH- $I^\circ$           | MH- $I^\circ$<br>MH-II                      | n.a.                                      | $II^\circ$ , $S_{X-H}$<br>MH-III, MH- $I^\circ$  |
| Hexane              | n.a.                                          | n.a.                                        | $S_{Dx-2}$<br>(MH-III)                    | $II^\circ$                                       |
| Methanol            | MH-I, MH-II<br>MH-IV, $S_{X-H}$<br>$II^\circ$ | n.a.                                        | MH- $I^\circ$                             | MH- $I^\circ$ , MH-II<br>$S_{X-H}$<br>$II^\circ$ |
| Nitromethane        | n.a.                                          | n.a.                                        | $II^\circ$                                | n.a.                                             |
| Tetrahydrofurane    | $S_{X-H}$                                     | n.a.                                        | n.a.                                      | MH- $I^\circ$ , MH-IV                            |
| Pyridine            | salt                                          | n.a.                                        | n.a.                                      | MH-III                                           |
| Water               | MH- $I^\circ$ , MH-II                         | n.a.                                        | n.a.                                      | n.a.                                             |
| Toluene             | n.a.                                          | n.a.                                        | $II^\circ$<br>MH-IV                       | n.a.                                             |
| Xylene              | n.a.                                          | n.a.                                        | $II^\circ$<br>MH- $I^\circ$               | $II^\circ$                                       |

<sup>a</sup>A saturated solution (at RT) of anhydrous gallic acid was filtered and the solvent was evaporated from an open vial at RT; <sup>b</sup>See Table S10; n.a. – not attempted.

**Table S9.** Results of gallic acid solid form screen: crystallization experiments<sup>a</sup> (II° – anhydrate form II°, MH-I° – monohydrate form I°, S<sub>AA</sub> – acetic acid solvate, S<sub>FA</sub> – formic acid solvate, S<sub>DX</sub> – dioxane solvate, S<sub>X-H</sub> – isostructural heterosolvates containing 1 mole water per mole gallic acid).

| Solvent             | Method | Solid form <sup>b</sup>                |
|---------------------|--------|----------------------------------------|
| 1-Butanol           | F/S    | II°                                    |
| 2-Butanol           | F/S    | II°                                    |
| 1-Propanol          | F      | S <sub>X-H</sub> (MH-III)              |
|                     | S      | MH-I°                                  |
| 2-Propanol          | F/S    | II°                                    |
| Ethanol             | F/S    | MH-I°                                  |
| Methanol            | F/S    | MH-I°                                  |
| Acetic acid         | F/S    | S <sub>AA</sub>                        |
| Acetone             | F      | S <sub>X-H</sub> (MH-III), MH-I°       |
|                     | S      | MH-I°                                  |
| Acetonitrile        | F/S    | II°                                    |
| 1,4-Dioxane         | F/S    | S <sub>DX2</sub> (S <sub>DX0.5</sub> ) |
| Ethyl methyl ketone | F/S    | II°                                    |
| Ethyl acetate       | F/S    | II°                                    |
| Formic acid         | F      | S <sub>FA</sub>                        |
| Tetrahydrofuran     | F/S    | MH-I°                                  |
| Water               | F/S    | MH-I°                                  |

<sup>a</sup>A hot saturated solution (close to the boiling point of each solvent used) was either cooled fast (F, in ice) or slow (S, test tube wrapped in aluminium foil) to 0° or RT, respectively. <sup>b</sup>See Table S10.

### 2.2.2 Sublimation experiments

Initial experiments were carried out under a Reichert polarization microscope (Vienna, A) equipped with a Kofler hot-stage. Anhydrous gallic acid was placed on a microscopic glass slide, covered with a cover slip and heated. Strong sublimation of the acid was observed at 210 °C. All three anhydrous polymorphs were found. **AH-I** seed crystals (in addition to **AH-II°**) could be harvested from sublimation experiments. For details see section 2.4.

Based on the initial results additional sublimation experiments were conducted. Anhydrous gallic acid was placed between two microscopic slides, which were separated by a glass ring (height approx. 2 mm) and stored on a preheated metal block (240 °C). Anhydrates **AH-I** and **AH-II°** were obtained. The sample had no contact with the top microscopic slide. For more details see section 2.4.

### 2.2.3 Desolvation studies (preparation of anhydrates I and III):

Monohydrates and solvates were desolvated at different conditions:

#### **a. 0% RH at 25 °C**

Selected solvate/hydrate samples were stored in a desiccator over silica-gel for six months, resulting predominantly in **AH-II**<sup>o</sup> (traces of **AH-I** were identified in some samples).

#### **b. Moisture sorption/desorption analysis (see section 2.6)**

#### **c. Thermal desolvation at higher temperatures (at ambient moisture conditions)**

Solvate/hydrate phases were stored at temperatures ranging 110 to 125 °C. Desolvation resulted predominantly in **AH-II**<sup>o</sup>.

#### **d. Thermal desolvation upon slowly heating (at ambient moisture conditions)**

Solvate/hydrate samples were slowly heated (on a Reichert polarized microscope equipped with a Kofler hot-stage, heating rate ca. 5 °C min<sup>-1</sup>) until a desolvation process was observed (i.e. darkening of the crystals. Temperature was then held until desolvation was completed. Several of the solvates/hydrates resulted in products with **AH-I** and **AH-III** being the major phase: Desolvating **MH-I**<sup>o</sup>, **MH-II**, **S-DMF4** (dimethyl formamide monosolvate) or **S-AA** (acetic acid monosolvate) were found to be the most promising for producing **AH-I**, and desolvating **S-DMF2** (dimethyl formamide water heterosolvate) the most promising for producing **AH-III**.

For the dioxane di-solvate (**S-Dx2**) a two-step desolvation process was observed, i.e. desolvation to a lower stoichiometric solvate (dioxane hemisolvate, **S-Dx0.5**) and in a second step desolvation to **AH-I** and **AH-II**<sup>o</sup>.

The desolvation experiments were repeated using a transmission infrared microscope (Bruker IFS 25 spectrometer connected to a Bruker microscope I with a 15x-Cassegrain-objective, Bruker Analytische Messtechnik GmbH, Ettlingen, D), equipped with a heatable accessory holder. Freshly prepared crystals of the solvates/hydrates were pressed onto a ZnSe disc and heated in 2 degree steps until desolvation was observed (< 80 °C). Every 2 degrees a spectrum was recorded, i.e. temperature held for 20 seconds (spectral range 4000 to 600 cm<sup>-1</sup>, resolution 4 cm<sup>-1</sup>, 32 interferograms per spectrum). Selected spectra are given in Figure S11.

MH-I<sup>o</sup> → AH-I

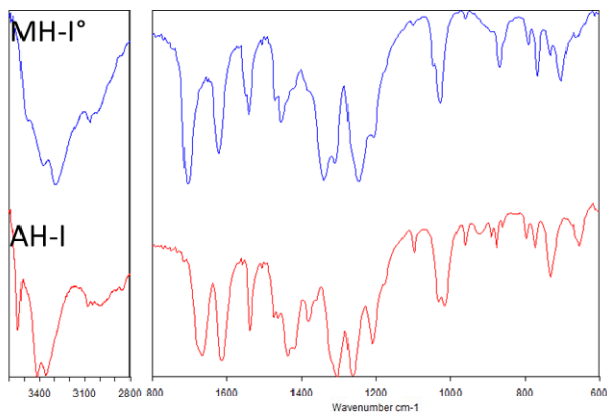

MH-II → AH-I

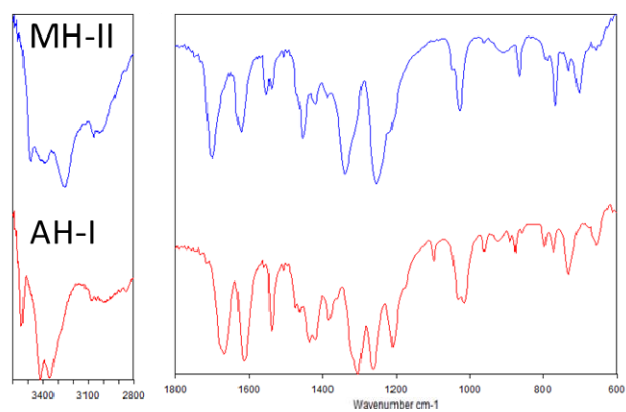

MH-III → AH-I + AH-II<sup>o</sup>

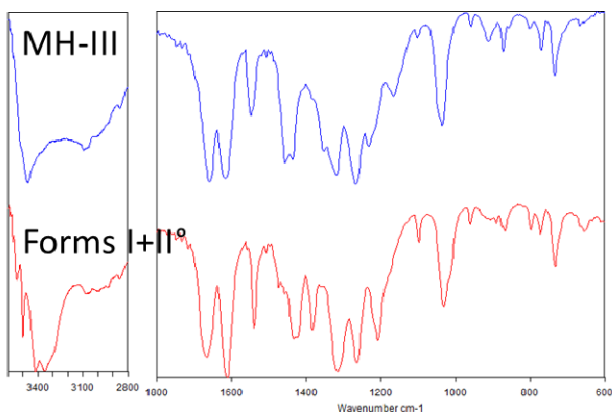

MH-IV → AH-II<sup>o</sup> + AH-III

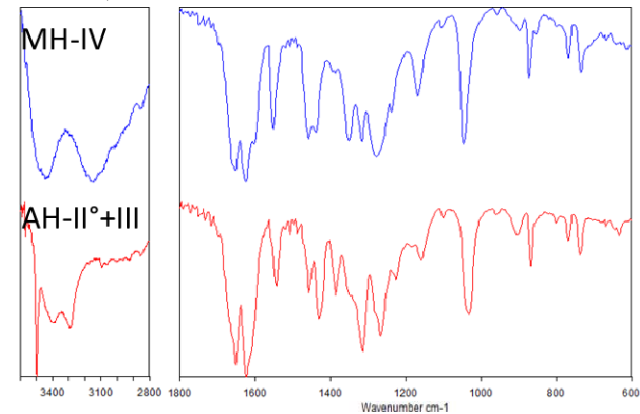

S-DMF4 → AH-I

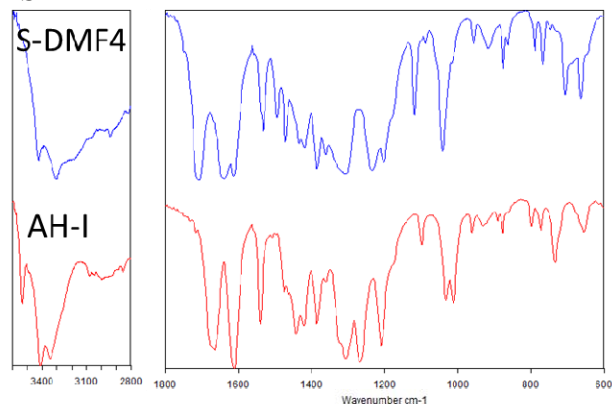

S-DMF2 → AH-III

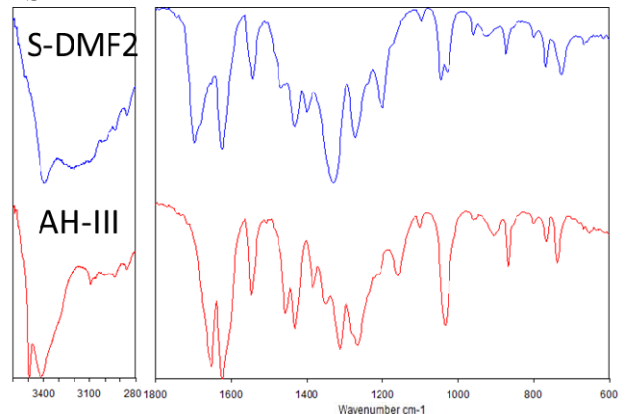

**Figure S11.** Fourier Transform – Infrared spectra of heating cycles showing the starting (in blue) and desolvation product (in red) for selected gallic acid solvates (S-DMF2 and S-DMF4)/hydrates (MH-I<sup>o</sup> - IV).

#### 2.2.4 Summary of experimental screen

The experimental solid form screen resulted in three anhydrate polymorphs (**AH-I**, **AH-II**<sup>o</sup> and **AH-III**), five monohydrates (**MH-I**<sup>o</sup>, **MH-II**, **MH-III**, **MH-IV** and **MH-V**) and 22 novel solvates. Solvates (Table S10) were obtained from acetic acid, formic acid, dioxane, dimethyl formamide, dimethyl sulfoxide, lower alcohols, acetone, ethyl methyl ketone and tetrahydrofuran. The majority of the solvates were mixed solvates with water (heterosolvates), with ten being isostructural heterosolvates.

**Table S10.** Gallic acid solvates emerging from the solvent screen.

| Type                                                                 | Solvate                                                                                                                                                                                                                    | GallicAcid:Water:Solvent ratio <sup>a</sup> |
|----------------------------------------------------------------------|----------------------------------------------------------------------------------------------------------------------------------------------------------------------------------------------------------------------------|---------------------------------------------|
| Homo-solvates                                                        | Acetic acid (S <sub>AA</sub> )                                                                                                                                                                                             | 1:0:1                                       |
|                                                                      | Dioxane 0.5 (S <sub>Dx-0.5</sub> )                                                                                                                                                                                         | 1:0:0.5                                     |
|                                                                      | Dioxane 2 (S <sub>Dx-2</sub> )                                                                                                                                                                                             | 1:0:2                                       |
|                                                                      | Dimethyl formamide (S <sub>DMF4</sub> )                                                                                                                                                                                    | 1:0:1                                       |
|                                                                      | Formic acid (S <sub>FA</sub> )                                                                                                                                                                                             | 1: 0: n.d.                                  |
| Hetero-solvates with Water                                           | Dioxane (S <sub>Dx-H</sub> )                                                                                                                                                                                               | 1:1:~0.25                                   |
|                                                                      | Dimethyl formamide (S <sub>DMF3</sub> )                                                                                                                                                                                    | 1:1:~0.75                                   |
|                                                                      | Dimethyl sulfoxide (S <sub>DMSO3</sub> )                                                                                                                                                                                   | 1:1:0.5                                     |
|                                                                      | Dimethyl sulfoxide (S <sub>DMSO4</sub> )                                                                                                                                                                                   | 1:0.5:0.5                                   |
| Isostructural Solvates <sup>b</sup><br>(Hetero-solvates with water). | Dimethyl formamide (S <sub>DMF2</sub> ),<br>Dimethyl sulfoxide (S <sub>DMSO1</sub> ),<br>Methanol, 1-Propanol, 2-Propanol, 1-<br>Butanol, Acetone, Ethyl methyl<br>ketone, Tetrahydrofuran,<br>Dioxane (S <sub>X-H</sub> ) | 1:1:x (depending on<br>solvent)             |
| Additional Solvates<br>(nor characterized in detail)                 | Dimethyl sulfoxide (S <sub>DMSO2</sub> )                                                                                                                                                                                   | n.d.                                        |
|                                                                      | Dimethyl sulfoxide (S <sub>DMSO5</sub> )                                                                                                                                                                                   | n.d.                                        |
|                                                                      | Dimethyl formamide (S <sub>DMF</sub> )                                                                                                                                                                                     | n.d. (contains water)                       |

<sup>a</sup>Ratio determined by Coulometric Karl-Fischer-Titration and Thermogravimetric Analysis.

<sup>b</sup>Classified as isostructural based on IR and PXRD measurements. n.d. – not determined.



## 2.3 Identification of gallic acid solid forms

### 2.3.1 Vibrational Spectroscopy

Infrared spectra were recorded with a diamond ATR crystal on a Perkin Elmer Spectrum One Fourier Transform spectrophotometer (Perkin Elmer, Norwalk Ct., USA) over a range of 4000 to 650  $\text{cm}^{-1}$  with a resolution of 2  $\text{cm}^{-1}$  (24 scans). The spectra were analysed with the Opus v 5.5 software.

IR spectroscopy (Figures S12 – S18) was used to identify the gallic acid solid forms and to get some insight into the structural features of the forms. The absence of bands in the spectral range of 1730 to 1705  $\text{cm}^{-1}$  indicates that the carboxylic acid is dimerized.<sup>18</sup> The most characteristic region for discriminating the forms is the region of the  $\nu(\text{O-H})$  vibrations.

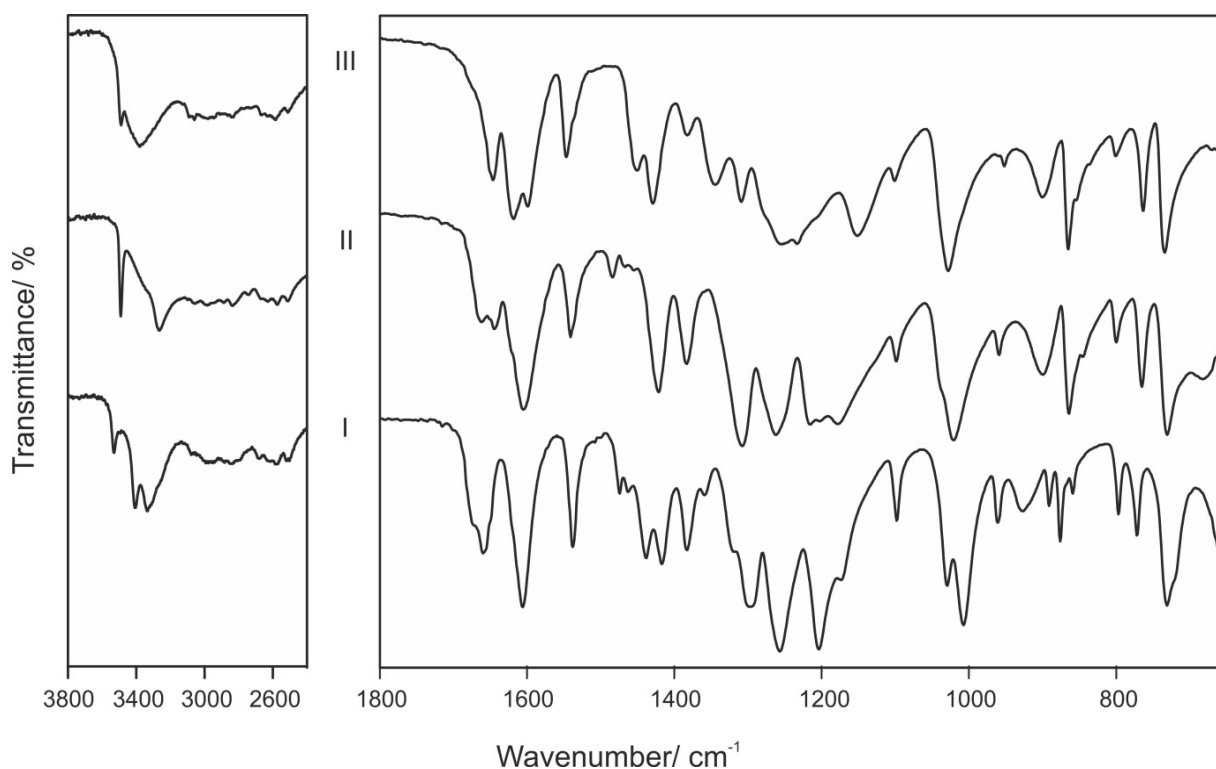

**Figure S12.** FT-IR spectra of gallic acid anhydrates (I – **AH-I**, II – **AH-II**<sup>o</sup> and III – **AH-III**).

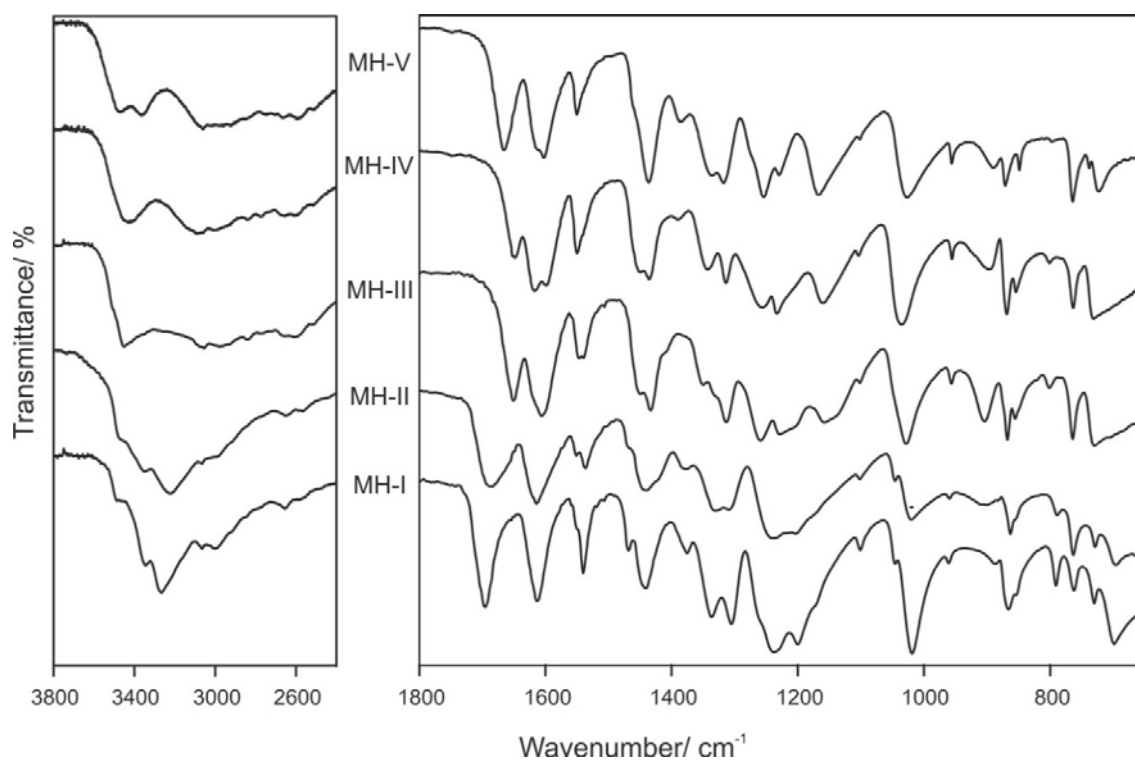

**Figure S13.** FT-IR spectra of gallic acid monohydrates.

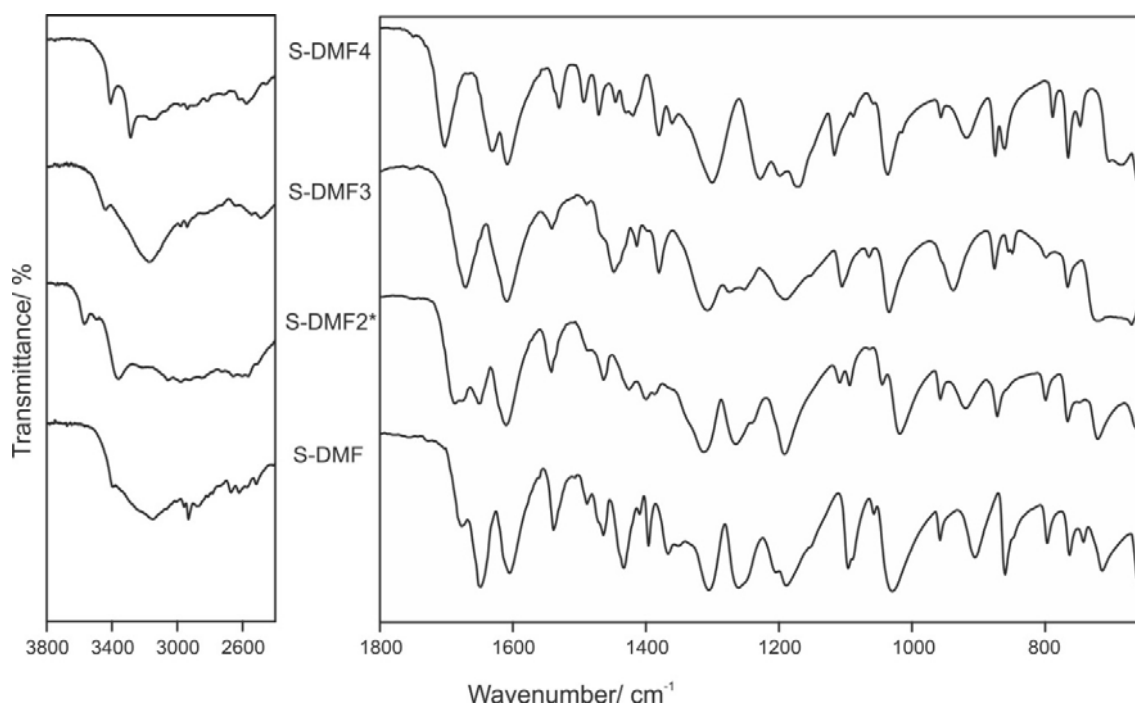

**Figure S14.** FT-IR spectra of gallic acid solvates containing the solvent dimethyl formamide (see Table S10). Spectrum marked with asterisk (\*): isostructural to solvates presented in Figure S18.

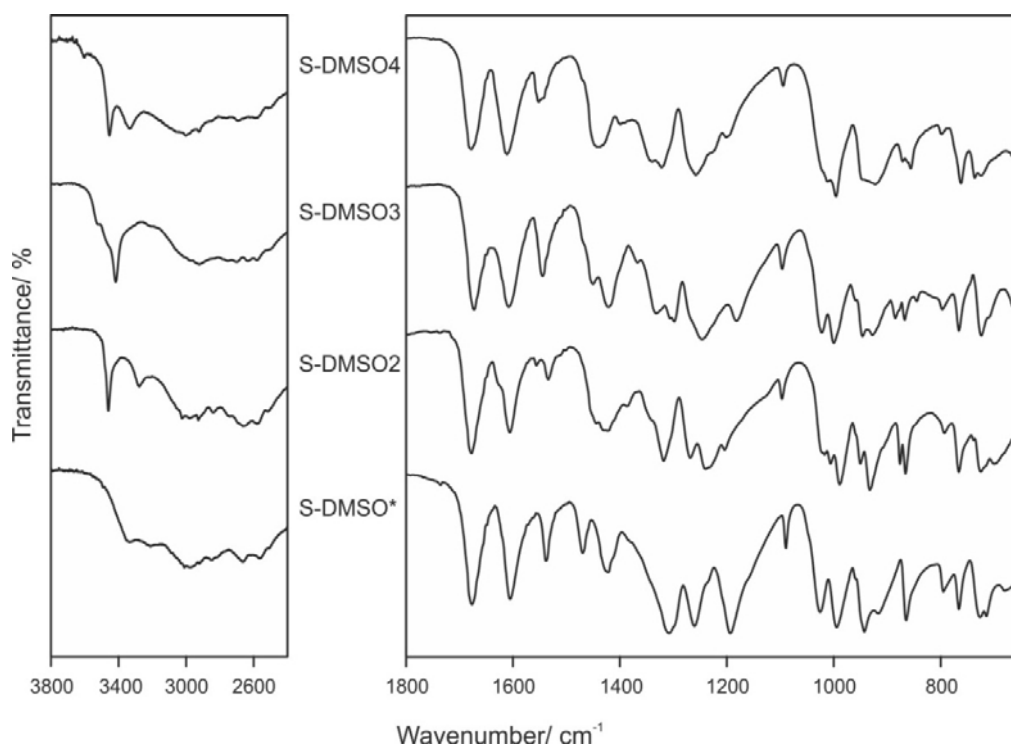

**Figure S15.** FT-IR spectra of gallic acid solvates containing the solvent dimethyl sulfoxide (see Table S10). Spectrum marked with asterisk (\*): isostructural to solvates presented in Figure S18.

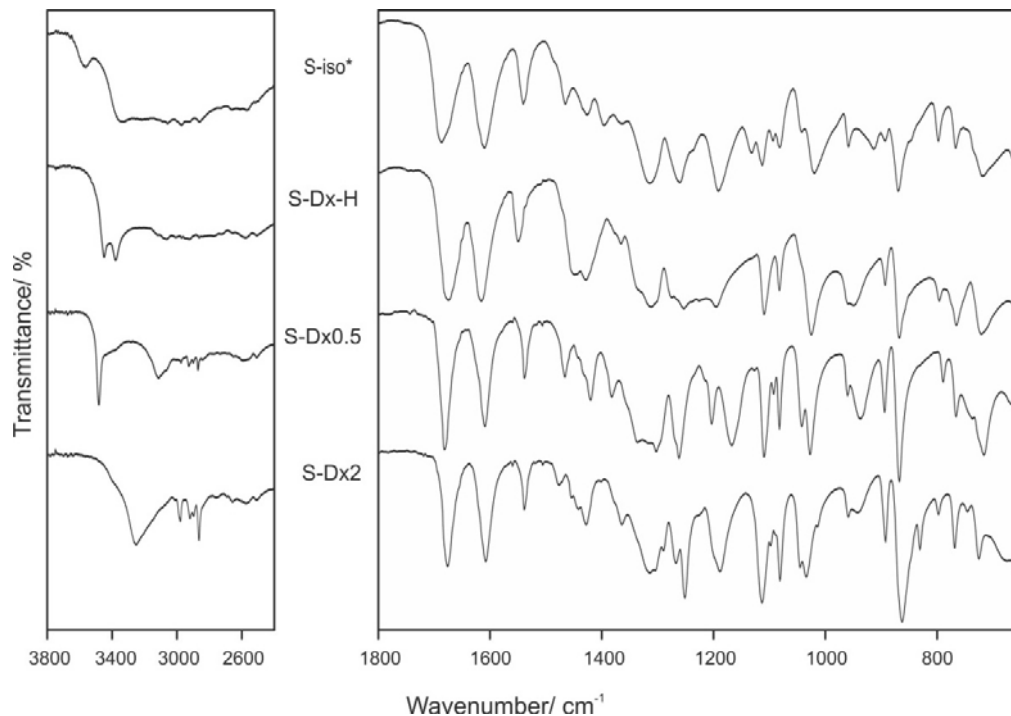

**Figure S16.** FT-IR spectra of gallic acid solvates containing the solvent dioxane (see Table S10). Spectrum marked with asterisk (\*): isostructural to solvates presented in Figure S18.

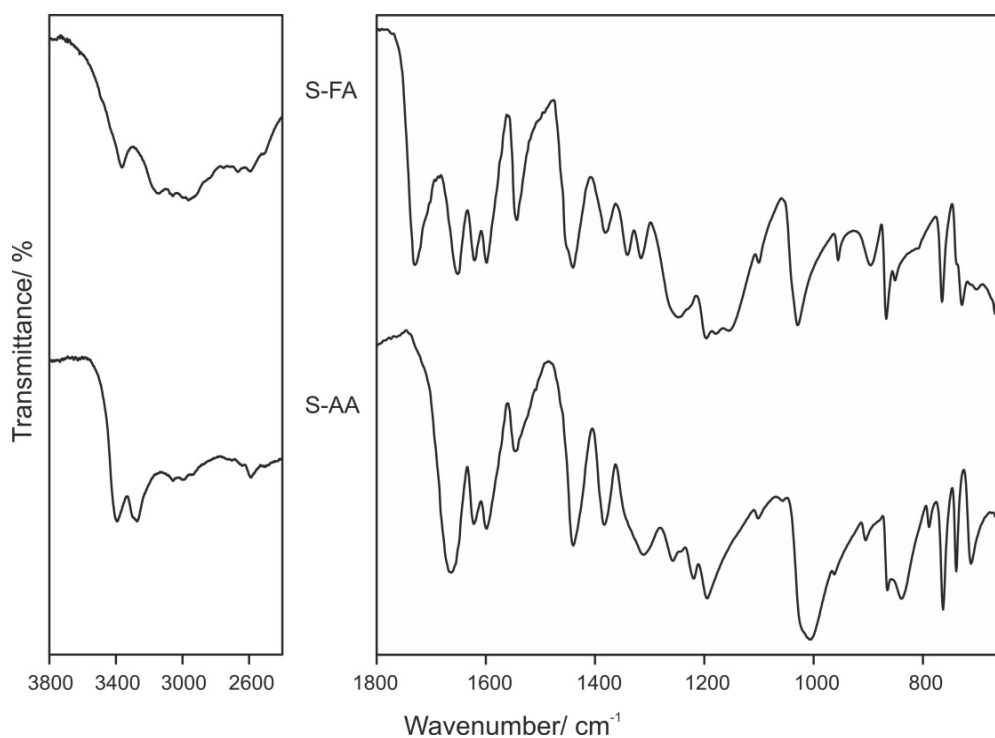

**Figure S17.** FT-IR spectra of gallic acid formic acid (FA) and acetic acid (AA) solvates.

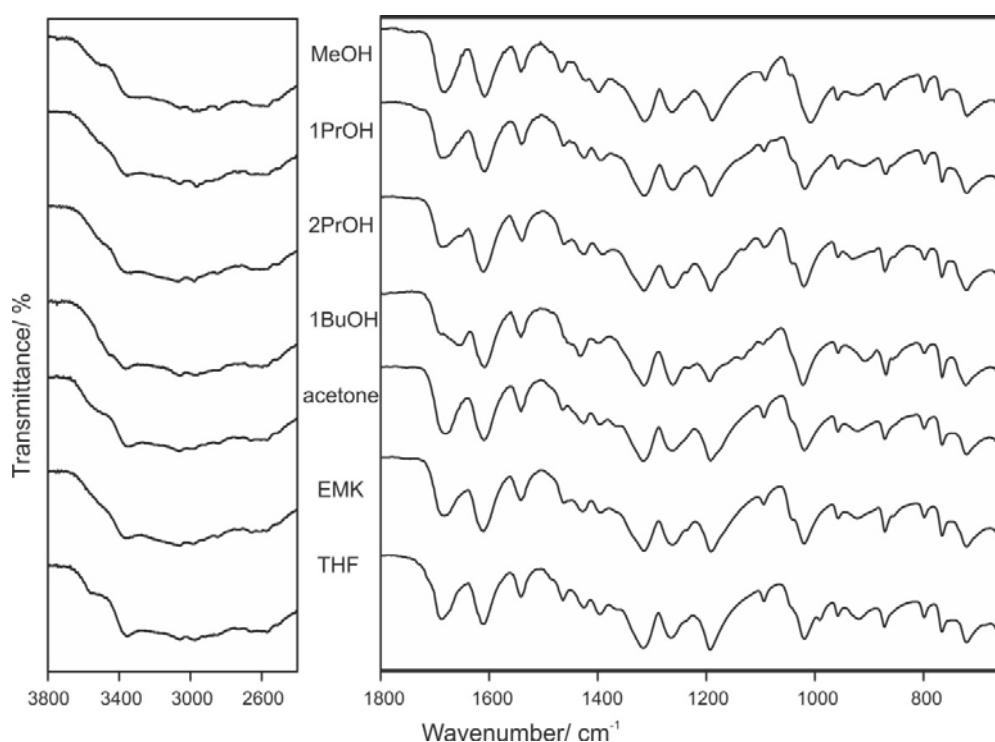

**Figure S18.** FT-IR spectra of isostructural gallic acid hetero-solvates with water and organic solvent (MeOH – methanol, 1PrOH, 1-propanol, 2PrOH – 2-propanol, 1BuOH – 1-butanol, EMK – ethyl methyl ketone, THF – tetrahydrofuran).

### 2.3.2 Powder X-ray diffraction

The powder X-ray diffraction patterns used for phase identification were obtained using a X'Pert PRO diffractometer (PANalytical, Almelo, The Netherlands) equipped with a theta/theta coupled goniometer in transmission geometry, programmable XYZ stage with well plate holder, Cu-K $\alpha_{1,2}$  radiation source with a focussing mirror, a 0.5° divergence slit and a 0.02° Soller slit collimator on the incident beam side, a 2 mm antiscattering slit and a 0.02° Soller slit collimator on the diffracted beam side, and a solid state PIXcel detector. The patterns were recorded at a tube voltage of 40 kV, tube current of 40 mA, applying a step size of  $2\theta = 0.013^\circ$  with 40 s per step in the  $2\theta$  range between 2° and 40°.

Powder pattern for the hydrates, contrasted to the simulated patterns from the experimental crystal structures are given in Figure S19.

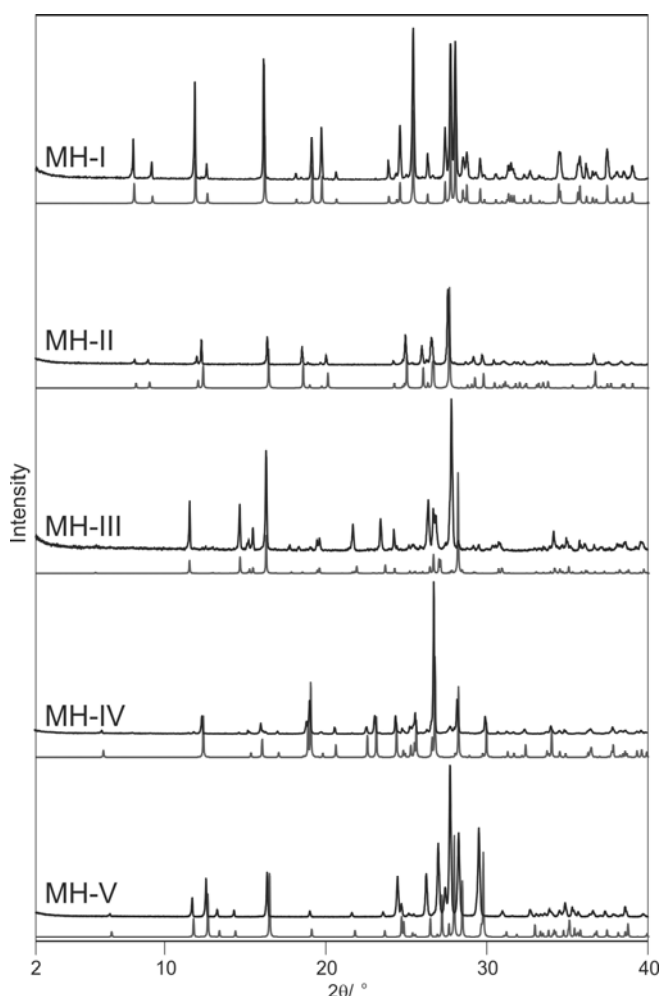

**Figure S19.** X-ray powder diffraction patterns of gallic acid monohydrates. The experimental diffractograms are contrasted with the calculated powder patterns (**MH-I**: KONTIQ01, **MH-II**: KONTIQ03, **MH-III**: KONTIQ04, **MH-IV**: KONTIQ and **MH-V**: own structure solution from PXRD). Peak shifts arise from different measurement temperatures.

## 2.4 X-ray Crystallography (details for structure solutions)

Crystal structures were solved for all three anhydrides (**AH-II**<sup>o</sup> from single crystal data, **AH-I** from powder X-ray diffraction data and **AH-III** using the predicted structure as a starting point for Rietveld refinement) and the fifth monohydrate structure (from powder data).

### 2.4.1 Anhydrate form II<sup>o</sup> (**AH-II**<sup>o</sup>)

No structure for the anhydrate (**AH-II**<sup>o</sup>) had been published when we were working on the compound. After finishing the work and during preparing the manuscript three determinations of **AH-II**<sup>o</sup> have been reported (CSD: IJUMEG<sup>19-21</sup> ref-code family). The structural details of all four **AH-II**<sup>o</sup> structure solutions are in agreement.

Single crystal X-ray diffraction data were collected on a Bruker AXS SMART APEX CCD diffractometer using graphite monochromated Mo-K $\alpha$  radiation ( $\lambda = 0.71073 \text{ \AA}$ ,  $\omega$  scans). Unit cell and data sets were collected at 20 °C. Data integration and final unit cell parameters were obtained using the program SAINT+.<sup>22</sup> Absorption correction was applied using the program SADABS.<sup>23</sup> The structure was solved using SIR04<sup>24</sup> and refined with SHELXL-97.<sup>25</sup> All hydrogen atoms bonded to carbon atoms were generated by a riding model on idealized geometries with  $U_{\text{iso}}(\text{H})=1.2U_{\text{eq}}(\text{C})$ . The polar hydrogen atoms were identified from the difference map and refined isotropically, with the exception of H2 and H3, where the position was refined with a constrained O–H bond distance.

Crystal data of **AH-II**<sup>o</sup>: C<sub>7</sub>H<sub>6</sub>O<sub>5</sub>,  $M_r = 170.12$ , monoclinic, space group  $C2/c$ ,  $T = 293(2) \text{ K}$ , size [mm]:  $0.35 \times 0.25 \times 0.2$ ,  $a = 25.685(3) \text{ \AA}$ ,  $b = 4.9273(5) \text{ \AA}$ ,  $c = 11.2508(12) \text{ \AA}$ ,  $\beta = 106.234(2)^\circ$ ,  $V = 1367.1(2) \text{ \AA}^3$ ,  $Z = 8$ ,  $\rho_{\text{calc}} = 1.653 \text{ g cm}^{-3}$ , 4765 reflections measured, 1315 independent reflections, 1023 observed reflections,  $\theta$  range for data collection:  $3.3 - 26.0^\circ$ ,  $h, k, l$ , range:  $-31 < h < 31$ ,  $-6 < k < 6$ ,  $-13 < l < 13$ , data: 732, restraints: 2, parameters: 124,  $R[F^2 > 2\sigma(F^2)] = 0.036$ ,  $wR(F^2) = 0.095$ ,  $R_{\text{int}} = 0.028$ , Goodness of fit on  $F^2 = 1.11$ ,  $\Delta\rho_{\text{max}} = 0.18$ ,  $\Delta\rho_{\text{min}} (\text{e \AA}^{-3}) = -0.21$ .

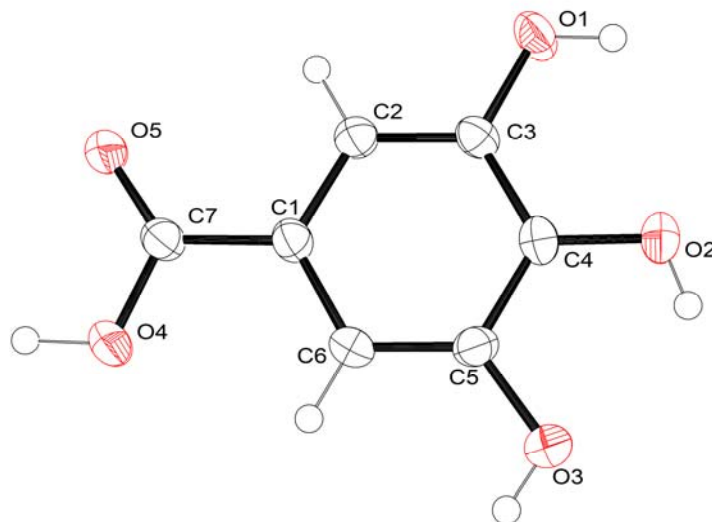

**Figure S20.** Thermal ellipsoid plot of gallic acid **AH-II**<sup>o</sup>. Displacement ellipsoids are drawn at the 50% probability level.

#### 2.4.2 Anhydrate form I (AH-I)

Gallic acid **AH-I** was loaded in a rotating 0.7 mm borosilicate capillary and mounted on a Bruker AXS D8 powder X-ray diffractometer equipped with primary monochromator (CuK $\alpha_1$ ,  $\lambda$  = 1.54056 Å) and Lynxeye position sensitive detector. Data was collected at room temperature using a variable count time scheme<sup>26,27</sup> (Table S11).

**Table S11.** Details of instrument and data collection parameters.

|                                         |                                       |    |                                 |                        |
|-----------------------------------------|---------------------------------------|----|---------------------------------|------------------------|
| Instrument name                         | Bruker D8                             |    |                                 |                        |
| Radiation                               | Cu K $\alpha_1$ , $\lambda$ =1.54056Å |    |                                 |                        |
| Generator settings                      | 40kV/50mA                             |    |                                 |                        |
| Monochromator                           | Primary, focusing curved Ge 111       |    |                                 |                        |
| Geometry                                | Transmission capillary geometry       |    |                                 |                        |
| Detector                                | Bruker Lynxeye PSD                    |    |                                 |                        |
| Scan Type                               | Fixed                                 |    | VCT                             |                        |
| Step size (°2 $\theta$ )                | 0.016                                 |    | 0.016                           |                        |
| Data range (°2 $\theta$ ) and step time | 2-40                                  | 8s | 3-22<br>22-40<br>40-55<br>55-70 | 2s<br>4s<br>15s<br>24s |

The diffraction pattern was indexed to a triclinic unit cell using the first twenty peaks with DICVOL04 and the space group was determined to be *P*-1 based on statistical assessment of systematic absences,<sup>28</sup> as implemented in DASH structure solution package.<sup>29</sup> The data was background subtracted and Pawley refinement<sup>30</sup> was used to extract the intensities and their correlations. Simulated annealing was used to optimize the gallic acid model against the diffraction data set (93 reflections) in direct space. The internal coordinate (*Z*-matrix) description was derived from the PBE0/6-31G(d,p) gas phase global conformational minimum (conf2, Table S1), with O–H distances normalized to 0.9 Å and C–H distances to 0.95 Å. The choice of conformation (polar proton positions) was based on DFT-D calculations (Table S2). The structure was solved using 800 simulated annealing runs of  $2.5 \times 10^7$  moves per run as implemented in DASH. Each gallic acid molecule was allowed seven (six external and one internal) degrees of freedom. The best solution returned a  $\chi^2$  ratio of ca. 2.79 (profile  $\chi^2$ /pawley  $\chi^2$ ) and was used as the starting point for a rigid body Rietveld refinement<sup>31</sup> in TOPAS V4.1.<sup>32</sup> The rigid body description was derived from the *Z*-matrix used in the simulated annealing runs and the final refinement included a total of 87 parameters (53 profile, 14 preferred orientation, 6 cell, 1 scale, 1 isotropic temperature factor, 6 position and 6 rotation) yielding a final  $R_{wp}$  = 5.904 (Figure S21).

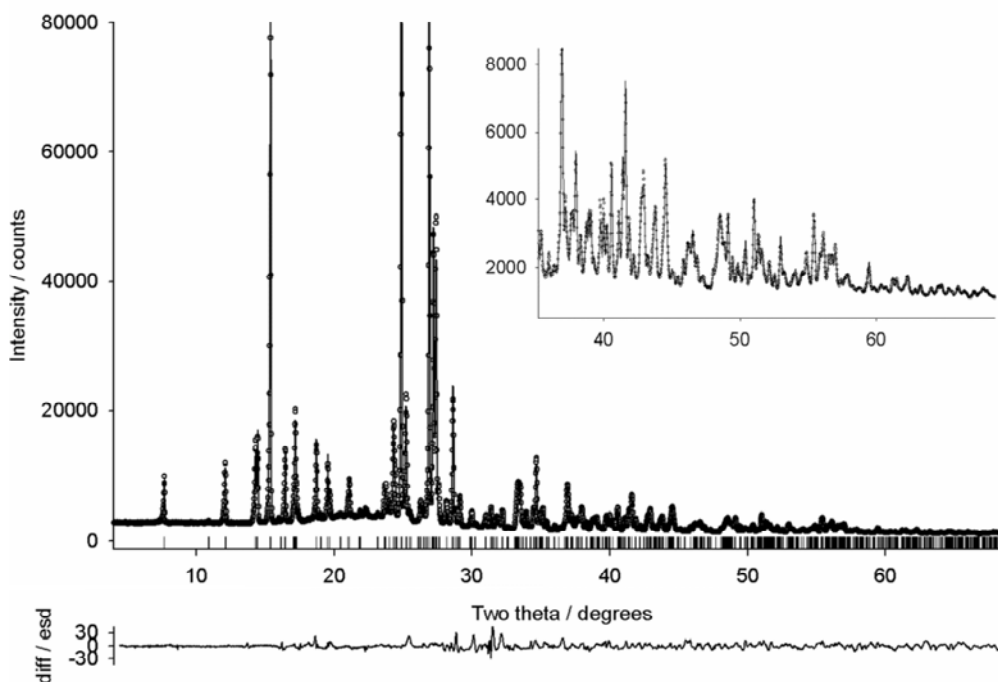

**Figure S21.** Final observed (points), calculated (line) and difference [(yobs - ycalc)/  $\sigma$ (yobs)] profiles for the Rietveld refinement of gallic acid anhydrate form I.

Crystal data of **AH-I**:  $C_7H_6O_5$ , Mr=170.12, triclinic, space group  $P-1$ ,  $T = 25\text{ }^\circ\text{C}$ , sample formulation: powder, specimen shape: 12 x 1.0 x 0.7 mm, wavelength: 1.54056 Å,  $a = 7.3183(2)\text{ }^\circ\text{Å}$ ,  $b = 8.2536(2)\text{ }^\circ\text{Å}$ ,  $c = 11.7148(3)\text{ }^\circ\text{Å}$ ,  $\alpha = 100.472(1)\text{ }^\circ$ ,  $\beta = 90.234(2)\text{ }^\circ$ ,  $\gamma = 90.984(2)\text{ }^\circ$   $V = 695.73(3)\text{ }^\circ\text{Å}^3$ ,  $Z = 4$ , density = 1.624 g cm<sup>-3</sup>, 2 theta range for data collection : 3 to 70°, background treatment: Chebyshev polynomial, No. of measured reflections: 580, Refinement method: Rietveld, data/parameter/restraints: 580/87/0, goodness of fit: 5.227 (on  $Y_{\text{obs}}$ ),  $R_{\text{wp}} = 5.904$ ,  $R_{\text{exp}} = 1.130$ ,  $R_p = 4.818$ .

The resulting structure from Rietveld refinement was further scrutinized by allowing all fractional coordinates to refine freely (168 parameters,  $R_{\text{wp}} = 4.792$ ). As expected, the improve  $R_{\text{wp}}$  came at the expense of some chemical sense (e.g. slight distortion in planarity of benzene ring, movement of H atoms to nonsensical positions), but otherwise, the geometry of the independent molecules was well preserved, confirming the correctness of the constrained refined crystal structure.



### 2.4.3 Monohydrate form V (MH-V)

Gallic acid **MH-V** was loaded in a rotating 0.7mm borosilicate capillary and mounted on a Bruker AXS D8 powder X-ray diffractometer equipped with primary monochromator ( $\text{CuK}\alpha_1$ ,  $\lambda = 1.54056 \text{ \AA}$ ) and Lynxeye position sensitive detector. Data was collected at 150K using a variable count time scheme<sup>26,27</sup> (Table S11). The diffraction pattern was indexed to a monoclinic unit cell using the first twenty peaks with DICVOL04 and the space group was determined to be  $\text{P2}_1/c$  based on statistical assessment of systematic absences,<sup>28</sup> as implemented in DASH structure solution package.<sup>29</sup> The data was background subtracted and Pawley refinement<sup>30</sup> was used to extract the intensities and their correlations. Simulated annealing was used to optimize the gallic acid and water model against the diffraction data set (61 reflections) in direct space. The internal coordinate (Z-matrix) description was derived from conf 4 (Table S1), with O–H distances normalized to 0.9  $\text{\AA}$  and C–H distances to 0.95  $\text{\AA}$ . The choice of conformation (polar proton positions) was based on the computed structures (section 1.3). The structure was solved using 800 simulated annealing runs of  $2.5 \times 10^7$  moves per run as implemented in DASH. Each gallic acid and water molecule was allowed seven (6 external and 1 internal) and six (external) degrees of freedom respectively. The best solution returned a  $\chi^2$  ratio of ca. 3.26 (profile  $\chi^2/\text{pawley } \chi^2$ ) and was used as the starting point for a rigid body Rietveld refinement<sup>31</sup> in TOPAS V4.1.<sup>32</sup> The rigid body description was derived from the Z-matrix used in the simulated annealing runs and the final refinement included a total of 71 parameters (44 profile, 9 preferred orientation, 4 cell, 1 scale, 1 isotropic temperature factor, 6 position and 6 rotation) yielding a final  $R_{\text{wp}} = 4.909$  (Figure S22).

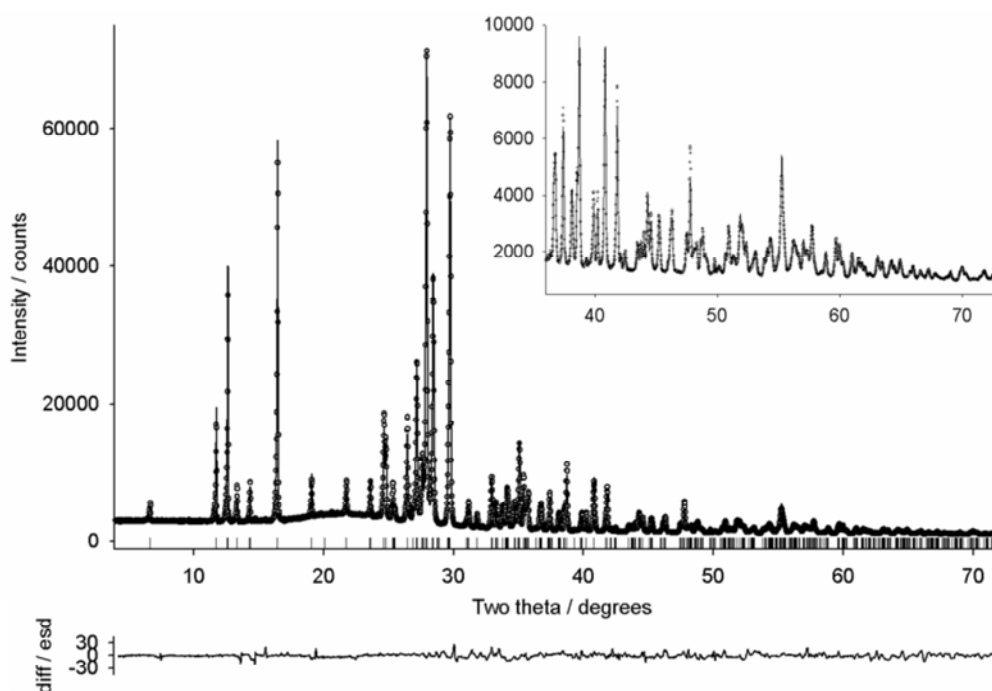

**Figure S22.** Final observed (points), calculated (line) and difference  $[(y_{\text{obs}} - y_{\text{calc}}) / \sigma(y_{\text{obs}})]$  profiles for the Rietveld refinement of gallic acid monohydrate V.

Crystal data of **MH-V**:  $C_7H_6O_5 \cdot H_2O$ , Mr=188.13, monoclinic, space group:  $P2_1/c$ , T = 123 °C, sample formulation: powder, specimen shape: 12 x 1.0 x 0.7 mm, wavelength: 1.54056 Å, a = 7.60719(9) Å, b = 3.64133(4) Å, c = 26.7915(4) Å,  $\beta$  = 98.421(1) °, V = 734.13(2) Å<sup>3</sup>, Z = 4, Z = 1, density = 1.702 g cm<sup>-3</sup>, 2 theta range for data collection: 3 to 70°, background treatment: Chebyshev polynomial, No. of measured reflections: 358, Refinement method: Rietveld, data/parameter/restraints: 358/71/0, goodness of fit: 4.298 (on Y<sub>obs</sub>), R<sub>wp</sub> = 4.909, R<sub>exp</sub> = 1.142, R<sub>p</sub> = 4.179.

The resulting structure from Rietveld refinement was further scrutinized by allowing all fractional coordinates to refine freely (86 parameters, R<sub>wp</sub> = 4.1). As expected, the improve R<sub>wp</sub> came at the expense of some chemical sense (e.g. slight distortion in planarity of benzene ring, movement of H atoms to nonsensical positions), but otherwise, the geometry of the independent molecules was well preserved, confirming the correctness of the constrained refined crystal structure.

#### 2.4.4 Anhydrate form III (**AH-III**)

The IR spectrum of gallic acid **AH-III** exhibits a close resemblance to the IR spectra obtained for the three ladder based hydrate structures (D1 structures: **MH-III**, **MH-IV** and **MH-V**, Figure 2b), exemplarily shown in Figure S23 for **AH-III** and **MH-IV**. Based on this information the presence of a ladder based D1 structure was expected.

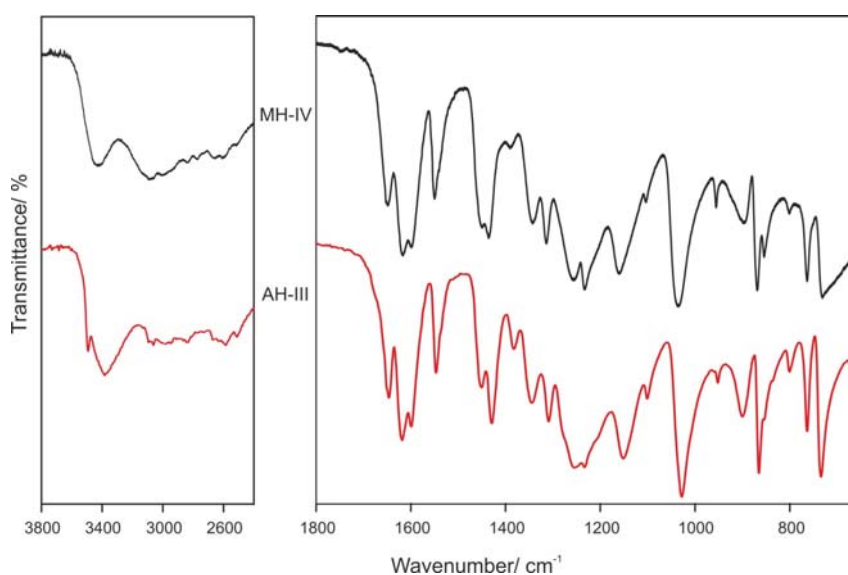

**Figure S23.** Comparison of the IR spectra of gallic acid **MH-IV** and **AH-III**.

Gallic acid **AH-III** was loaded in a rotating 0.7mm borosilicate capillary and mounted on a Bruker AXS D8 powder X-ray diffractometer equipped with primary monochromator ( $CuK\alpha_1$ ,  $\lambda$  = 1.54056 Å) and Lynxeye position sensitive detector. Data were collected at room temperature using a variable count time scheme<sup>26,27</sup> (Table S11). Due to the presence of phase impurities, the

crystal structure prediction results were used to solve the structure. The simulated powder pattern of three of the computationally generated D1 ladder structures closely matched the reflections of the experimental **AH-III**. The three structures (A1\_20, A3\_86 and A4\_20) differed only in proton position, but not in the packing. The most stable for the three structures (DFT-D calculations, with modified lattice parameters obtained after Pawley type refinement<sup>30</sup> against mixed phase data from **AH-III** – 72.5% and **AH-I** – 27.5%) was taken as a starting structure for a multi-phase restrained Rietveld refinement<sup>31</sup> in TOPAS Academic V4.1.<sup>32</sup> In the course of the refinement the **AH-I** unit-cell and peak-shape parameters were allowed to vary, whilst all atomic coordinates were fixed. All atomic positions (including H atoms) for **AH-III** structure were refined, subject to a series of restraints on bond lengths, bond angles and planarity. The final refinement included a total of 116 parameters (41 profile, 4 cell, 1 scale, 1 isotropic temperature factor, 15 preferred orientation and 54 positions yielding a final  $R_{wp} = 3.074$  (Figure S24).

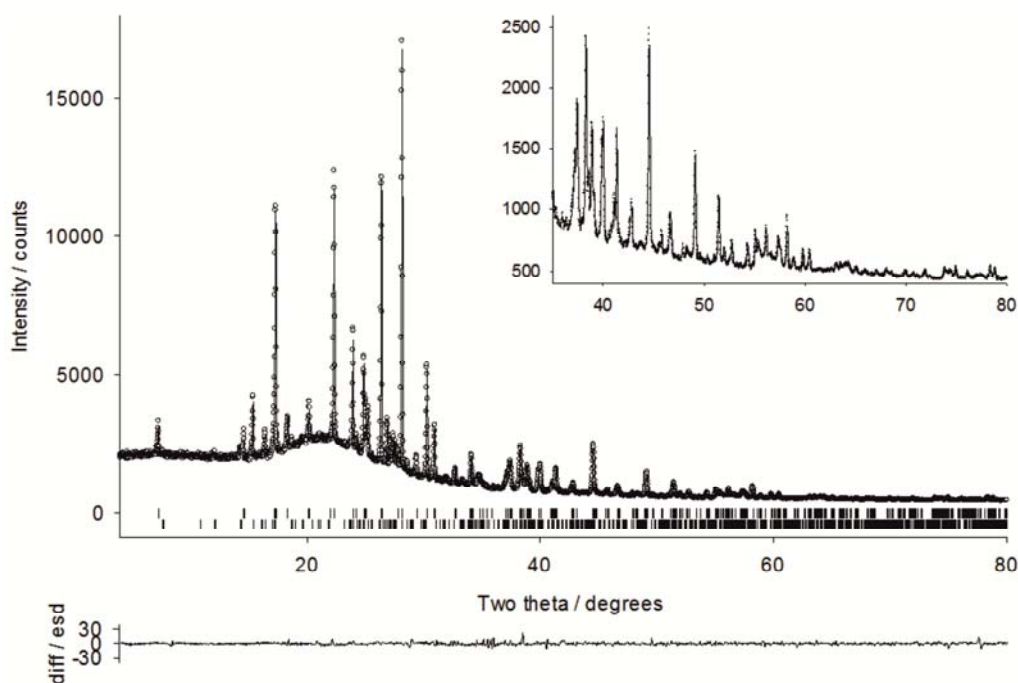

**Figure S24.** Final observed (points), calculated (line) and difference  $[(y_{obs} - y_{calc}) / \sigma(y_{obs})]$  profiles for the Rietveld refinement of gallic acid anhydrate form III (major phase, tic marks: second row) and **AH-I** (byproduct, tic marks: first row).

Crystal data of gallic acid **AH-III**:  $C_7H_6O_5$ ,  $M_r = 170.12$ , Monoclinic, space group;  $P2_1/c$ ,  $T = 25$  °C, sample formulation: powder, specimen shape: 12 x 1.0 x 0.7 mm, wavelength: 1.54056 Å,  $a = 5.2303(1)$  Å,  $b = 5.26495(12)$  Å,  $c = 24.7927(4)$  Å,  $\beta = 102.1116(17)$  °,  $Z = 4$ , density = 1.693 g cm<sup>-3</sup>, 2 theta range for data collection: 3 to 80°, background treatment: Chebyshev polynomial, No. of measured reflections: 414, Refinement method: Rietveld, data/parameter/restraints: 414/116/44, goodness of fit: 2.065 (on  $Y_{obs}$ ),  $R_{wp} = 3.074$ ,  $R_{exp} = 1.460$ ,  $R_p = 2.586$ .

## 2.5 Thermal Analysis, thermodynamic and kinetic stability

*Thermogravimetric analysis* (TGA) was carried out with a TGA7 system (Perkin-Elmer, Norwalk, CT, USA) using the Pyris 2.0 Software. Approximately 3-5 mg of sample was weighed into a platinum pan. Two-point calibration of the temperature was performed with ferromagnetic materials (Alumel and Ni, Curie-point standards, Perkin-Elmer). A heating rate of 5 K min<sup>-1</sup> was applied and dry nitrogen was used as a purge gas (sample purge: 20 mL min<sup>-1</sup>, balance purge: 40 mL min<sup>-1</sup>).

*Differential scanning calorimetry* (DSC) thermograms were recorded on a DSC 7 (Perkin-Elmer) controlled by the Pyris 2.0 software. Using a UM3 ultramicrobalance (Mettler), samples of approximately 1 - 3 mg were weighed into sealed/perforated aluminium pans. The hydrate and solvate samples were heated from 20 to 120 °C using a rate of 10 °C min<sup>-1</sup> and with dry nitrogen as the purge gas (purge: 20 ml min<sup>-1</sup>). For faster heating rates a Diamond DSC (Perkin-Elmer), controlled by the Pyris 7.0 software, was used. Samples of approximately 0.5 mg were weighed with the same ultramicrobalance into sealed T<sub>zero</sub> pans (Waters). The anhydrate samples were heated from 20 to > 320 °C with heating rates of 50 and 100 K min<sup>-1</sup>. The two instruments were calibrated for temperature with pure benzophenone (mp 48.0 °C) and caffeine (236.2 °C), and the energy calibration was performed with indium (mp 156.6 °C, heat of fusion 28.45 Jg<sup>-1</sup>). The errors on the stated temperatures (extrapolated onset temperatures) and enthalpy values are calculated at the 95% confidence intervals (CI) based on at least three measurements.

Gallic acid **MH-I**<sup>o</sup> forms transparent block or needle like crystals, **MH-II** fine long needles, **MH-IV** small prismatic, and **MH-V** thin platy and needle like multi-layered crystals. **MH-III** batches were obtained via a transformation step (desolvation) and therefore the hydrate crystals already showed the typical signs of a desolvation product, i.e. white non-transparent powder appearing dark under polarized light microscopy. Single crystals of the hydrates turned opaque when slowly heated (heating rate < 5 °C min<sup>-1</sup>), while the original shape of the crystals was more or less maintained ("pseudomorphosis"). The desolvation process was largely completed at about 75 °C for **MH-V**, 85 °C for **MH-IV**, 90 °C for **MH-III** and 115 °C for forms **MH-II** and **MH-I**<sup>o</sup> upon heating. Under these desolvation conditions **MH-I**<sup>o</sup> and **MH-II** dehydrated to forms **I** and/or **II**<sup>o</sup>, **MH-III** predominantly to form **II**<sup>o</sup> (+ **AH-I**), and **MH-IV** to **AH-II**<sup>o</sup> with **AH-III** impurities. At faster heating rates (> 10 °C min<sup>-1</sup>) and embedding in high-viscosity silicon oil peritectic melting of the **MHs I**<sup>o</sup>-**IV** was observed (**MH-IV**: 111.5 – 113.5 °C, **MH-III**: 115 – 117 °C, **MH-II**: 119-120 °C, and **MH-I**<sup>o</sup>: 124 - 126 °C). The rather high peritectic temperatures (all above the boiling point of water) indicate that the water molecules are well accommodated in these four structures. For **MH-V** the melting point could not be determined. The **MH-V** differential scanning calorimetry (DSC) curve exhibited an exothermic event starting below 60 °C (closed pan, isochoric conditions), a phase transition to **MH-I**<sup>o</sup> (heat of transition -3.4 ± 0.2 kJ mol<sup>-1</sup>).

The solvent:compound ratios of the five hydrate phases were determined with TGA (Figure S14). The TGA curves of all hydrates show one distinct step due to the loss of water. The mass loss of **MH-I** (9.53 %), **MH-II** (9.61 %), **MH-III** (9.55 %), **MH-IV** (9.70%), and **MH-V** (9.67 %) corresponds to 1.00 to 1.02 mole water per mole gallic acid, confirming the monohydrate stoichiometry. Furthermore, the TGA measurements indicated following thermal stability order:

**MH-I**<sup>o</sup> (most stable) > **MH-II** > **MH-III** > **MH-IV** > **MH-V** (least stable), essentially the same order as found for the order of the **MH-I**<sup>o</sup> - **MH-IV** peritectic melting temperatures. The samples were gently ground to similar particle size prior measurement to exclude particle size dependent influences on the dehydration temperatures.

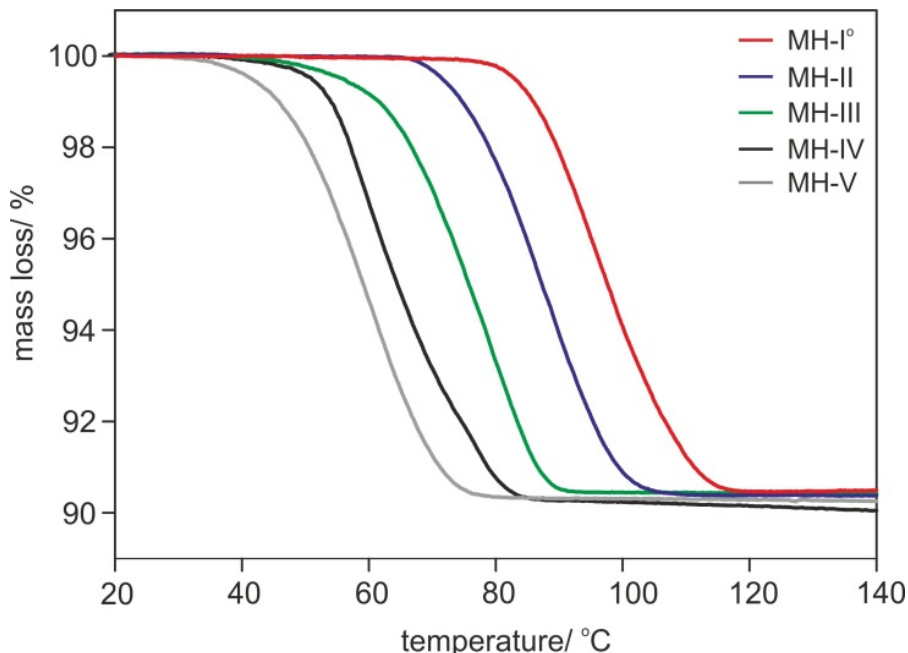

**Figure S25.** Overlay of the TGA curves of the GalAc MHs (temperature range: 20 – 140 °C, heating rate 5 °C min<sup>-1</sup>).

Upon further heating (anhydrate) strong sublimation is observed at approximately 210 °C. Initial growth of small grainy crystals occurred (**AH-I** and few **AH-III** crystals), followed by the growth of spear-like and elongated prismatic crystals (**AH-II**<sup>o</sup>). The spear-like and prismatic crystals grew at expense of the grainy crystals (**AH-I**) which exhibit a higher vapor pressure. Simultaneously few of the originally grown crystals melted at 225 to 230 °C. The melting point corresponds to Lindpainter’s “unstable” modification<sup>33</sup> (**AH-III** based on our nomenclature), but no transformation to the “stable” modification could be seen for the **AH-III** crystals. The presence of all three forms (and order of appearance) was confirmed with infrared spectroscopy. These observations could only be made if fast heating rates (> 10 °C min<sup>-1</sup>) were applied. If slow heating rates were applied (< 5 °C min<sup>-1</sup>) only **AH-II**<sup>o</sup> crystals were identified among the sublimed crystals. Above 235 °C strong thermolysis of the acid started. With the aid of differential scanning calorimetry, an endothermic **AH-II**<sup>o</sup> to **AH-I** phase transformation (> 245 °C, heating rate 50 °C min<sup>-1</sup>, Figure S26) could be identified and the obtained form was confirmed with infrared spectroscopy and powder X-ray diffractometry. In the hot-stage microscopic investigations thermolysis of the acid was too strong to unambiguously identify this transformation (applying heating rates << 50 °C min<sup>-1</sup>). An instant melting point of 263 to 265 °C could be determined on the hot-bench for the higher melting form (**AH-I**).

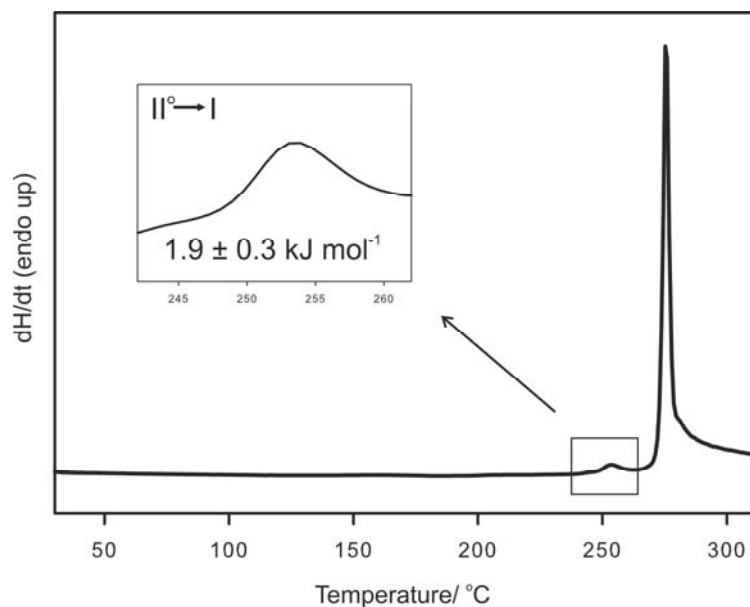

**Figure S26.** Differential scanning calorimetry curve that shows the transformation of AH-II° to AH-I (heating rate: 50 °C min<sup>-1</sup>).

Additional sublimation experiments with the sample between two microscopic slides (no contact between the sample and the upper microscopic slide) were performed on top of a preheated metal block (metal surface temperature approx. 240 °C, glass surface on which crystal sublimed to approx. 190 °C at the end of the experiment). Grainy **AH-I** crystals were observed immediately on the glass surface. After few minutes the spear-like **AH-II°** crystals grew on top of the powder and grew further up to the upper microscopic slide, reaching the grainy **AH-I** crystals. Within 10 to 20 minutes all **AH-I** crystals “transformed” through the vapor phase to **AH-II°**. It has to be noted that all these thermal events were observed below the experimental **AH-II°** to **AH-I** transformation temperature ( $T_{\text{trs,expl.}} > 245$  °C).

The combination of DSC and sublimation experiments suggested that the thermodynamic transition point ( $T_{\text{trs}}$ ) is probably somewhere between 200 and 245 °C.

The thermodynamic relationship of the gallic acid anhydrate polymorphs is displayed in a semi-schematic energy/temperature diagram (Figure S27).

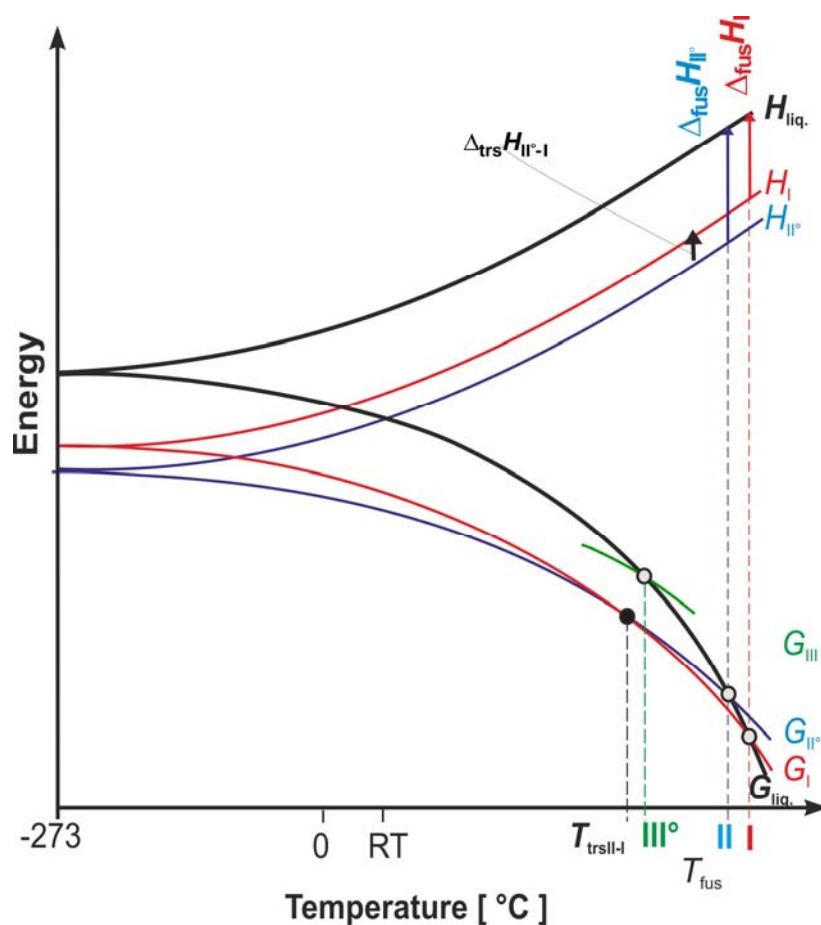

**Figure S27.** Semi-schematic energy/temperature diagram of gallic acid anhydrate polymorphs.  $T_{\text{fus}}$  = melting point,  $G$  = Gibbs free energy,  $H$  = enthalpy,  $\Delta_{\text{fus}}H$  = enthalpy of fusion,  $T_{\text{trs}}$  – transition point,  $\Delta_{\text{trs}}H$  = transition enthalpy, liq.  $\Delta_{\text{fus}}H$  = liquid phase (melt).

## 2.6 Moisture Sorption/Desorption Analysis

The five monohydrate polymorphs and the thermodynamically most stable anhydrate form at room temperature (**AH-II°**) were subjected to gravimetric moisture sorption studies at 25 °C (Figure S28).

Dynamic moisture sorption and desorption studies were performed with the automatic multi-sample (gravimetric) moisture sorption analyzer (SPS11-10 $\mu$ , Project-Messtechnik, Ulm, D). Approximately 100 to 600 mg of sample were used for the investigations. The samples were gently ground prior to measurement to reduce the influence of particle size and surface area. The measurement cycles were started at 40% relative humidity (RH). Sorption and desorption cycles covered the 10% to 90% RH range in 10% steps and the 0% to 10% range in 5% steps. The equilibrium condition for each step was set to a mass constancy of  $\pm 0.01\%$  over 15 minutes.

**AH-II°** absorbs water and transforms only to **MH-I°** at the highest RH value (90%, Figure S28). The measured mass gain of 10.39% corresponds to 0.98 mole water. **MH-I°**, **MH-II** and **MH-III** dehydrated only at driest conditions (below 5% RH) and **MH-IV** only under rather dry conditions (5% RH and below). In contrast to these high stability forms (moisture dependent) **MH-V** started dehydrating at ambient conditions (<40 % RH and below). Only **AH-II°** and **MH-I°** emerged from the sorption/desorption cycles as confirmed with PXRD. The profile of the moisture sorption-desorption isotherms (distinct steps and hysteresis between the sorption and desorption) are characteristic for stoichiometric hydrates.<sup>34</sup> From the hysteresis we can deduce that **AH-II°** as well as the hydrates **MH-I°**, **MH-II**, **MH-III** and **MH-IV** can be handled without problems and are expected to be storage stable provided extremely low (< 10% RH) or high (> 80 % RH) moisture conditions are avoided. However, a mixture of any hydrate and **AH-II°** started absorbing water already at lower RH (RH > 50%).

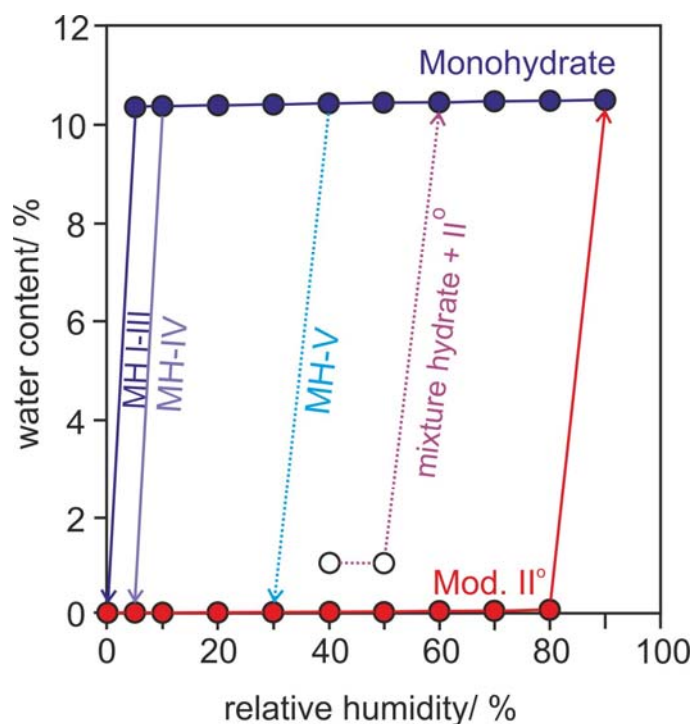

**Figure S28.** Moisture sorption/desorption isotherms of gallic acid hydrates, **AH-II°** and a hydrate/**AH-II°** mixture performed at 25 °C. Isotherms were constructed by the combination of the desorption cycles of the hydrates and sorption cycles of **AH-II°** and hydrate/**AH-II°** mixture.



## Reference List

1. Kazantsev, A. V.; Karamertzanis, P. G.; Adjiman, C. S.; Pantelides, C. C. Efficient Handling of Molecular Flexibility in Lattice Energy Minimization of Organic Crystals. *J. Chem. Theory Comput.* **7**[6], 1998-2016. 2011.
2. Karamertzanis, P. G.; Pantelides, C. C. *Mol. Phys.* **2007**, *105*, 273-291.
3. Breneman, C. M.; Wiberg, K. B. *J. Comput. Chem.* **1990**, *11*, 361-373.
4. Price, S. L.; Leslie, M.; Welch, G. W. A.; Habgood, M.; Price, L. S.; Karamertzanis, P. G.; Day, G. M. *Phys. Chem. Chem. Phys.* **2010**, *12*, 8478-8490.
5. Stone, A. J. *J. Chem. Theory Comput.* **2005**, *1*, 1128-1132.
6. Cooper, T. G.; Hejczyk, K. E.; Jones, W.; Day, G. M. *J. Chem. Theory Comput.* **2008**, *4*, 1795-1805.
7. Day, G. M.; Cooper, T. G. *CrystEngComm* **2010**, *12*, 2443-2453.
8. Braun, D. E.; Karamertzanis, P. G.; Price, S. L. Which, if any, hydrates will crystallise? Predicting hydrate formation of two dihydroxybenzoic acids. *Chem. Commun. (Cambridge, U. K.)* 47[19], 5443-5445. 2011.
9. Cossi, M.; Scalmani, G.; Rega, N.; Barone, V. *J. Chem. Phys.* **2002**, *117*, 43-45.
10. Gelbrich, T.; Hursthouse, M. B. *CrystEngComm* **2005**, *7*, 324-336.
11. Chisholm, J. A.; Motherwell, S. *J. Appl. Crystallogr.* **2005**, *38*, 228-231.
12. Macrae, C. F.; Bruno, I. J.; Chisholm, J. A.; Edgington, P. R.; McCabe, P.; Pidcock, E.; Rodriguez-Monge, L.; Taylor, R.; van de Streek, J.; Wood, P. A. *J. Appl. Crystallogr.* **2008**, *41*, 466-470.
13. Clark, S. J.; Segall, M. D.; Pickard, C. J.; Hasnip, P. J.; Probert, M. J.; Refson, K.; Payne, M. C. *Z. Kristallogr.* **2005**, *220*, 567-570.
14. Perdew, J. P.; Burke, K.; Ernzerhof, M. *Phys. Rev. Lett.* **1996**, *77*, 3865-3868.
15. Vanderbilt, D. *Phys. Rev. B* **1990**, *41*, 7892-7895.
16. Tkatchenko, A.; Scheffler, M. *Phys. Rev. Lett.* **2009**, *102*, 073005-1-073005/4.
17. Monkhorst, H. J.; Pack J.D. *Phys. Rev. B* **1976**, *13*, 5188-5192.
18. Colthup, N.; Daly, L. H.; Wiberley, S. E. *Introduction to Infrared and Raman Spectroscopy. 2nd Ed*; 1975.
19. Clarke, H. D.; Arora, K. K.; Wojtas, L.; Zaworotko, M. J. *Cryst. Growth Des.* **2011**, *11*, 964-966.
20. Zhao, J.; Khan, I. A.; Fronczek, F. R. *Acta Crystallogr Sect E Struct Rep Online* **2011**, *67*, o316-o317.
21. Hirun, N.; Saithong, S.; Pakawatchai, C.; Tantishaiyakul, V. *Acta Crystallogr. , Sect. E: Struct. Rep. Online* **2011**, *E67*, o787.

22. *Saint+*: Area detector control and data integration and reduction software, Brüker AXS: **2001**
23. *SADABS*, Sheldrick, G. M. Germany: University of Göttingen, **1997**
24. Burla, M. C.; Caliandro, R.; Camalli, M.; Carrozzini, B.; Cascarano, G. L.; De Caro, L.; Giacovazzo, C.; Polidori, G.; Spagna, R. *J. Appl. Crystallogr.* **2005**, *38*, 381-388.
25. Sheldrick, G. M. *Acta Crystallogr. , Sect. A* **2008**, *A64*, 112-122.
26. Hill, R. J.; Madsen, I. C. In *Structure Determination from Powder Diffraction Data*, David, W. I. F., Shankland, K., McCusker, L. B., Baerlocher, Ch., Eds.; Oxford Science Publications: Oxford, **2002**; 98-117.
27. Shankland, K.; David, W. I. F.; Sivia, D. S. *J. Mater. Chem.* **1997**, *7*, 569-572.
28. Markvardsen, A. J.; David, W. I. F.; Johnson, J. C.; Shankland, K. *Acta Cryst. A* **2001**, *57*, 47-54.
29. David, W. I. F.; Shankland, K.; van de Streek, J.; Pidcock, E.; Motherwell, W. D. S.; Cole, J. C. *J. Appl. Crystallogr.* **2006**, *39*, 910-915.
30. Pawley, G. S. *J. Appl. Crystallogr.* **1981**, *14*, 357-361.
31. Rietveld, H. M. *J. Appl. Crystallogr.* **1969**, *2*, 65-71.
32. Coelho, A. A. *Topas user manual*; Version 4.1 ed.; Bruker AXS GmbH: Karlsruhe, Germany, 2004.
33. Lindpaintner, E. Microscopic study of polymorphic substances. II. *Mikrochemie* *27*, 21-41. 1939.
34. Griesser, U. J. In *Polymorphism: In the Pharmaceutical Industry*, Hilfiker, R., Ed.; Wiley-VCH: Germany, **2006**; 211-233.
